# Supplementary material for: Unequal effect of ethanol–water on the stability of ct-DNA, poly[(dA–dT)]2 and poly(rA)·poly(rU). Thermophysical properties
Source: Royal Society of Chemistry journal article supplement (doi:10.1039/c4cp03459g), 2014-11-21
Supplement: c4cp03459g1.pdf [file c4cp03459g1.pdf]

## Unequal effect of ethanol/water on the stability of ct-DNA, poly [(dA-dT)]<sub>2</sub> and poly(rA)·poly(rU). Thermophysical properties†

Rebeca Ruiz,<sup>a</sup> Francisco J. Hoyuelos,<sup>a</sup> Ana M. Navarro,<sup>a</sup> José M. Leal<sup>a</sup> and Begoña García,<sup>\*a</sup>

<sup>a</sup>Universidad de Burgos, Departamento de Química, 09001 Burgos, Spain.

\*Corresponding Author: [begin@ubu.es](mailto:begin@ubu.es)

### Electronic Supplementary Information (ESI)

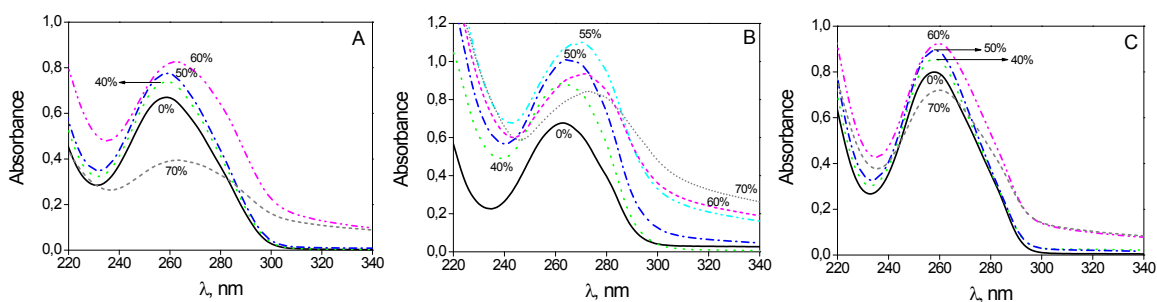

**Fig. 1S** UV spectra of the three polynucleotides recorded for different ethanol contents, (A) ct-DNA, (B) [poly(dA-dT)]<sub>2</sub> and (C) poly(rA)·poly(rU).  $C_P = 5 \times 10^{-5} M_{BP}$ ,  $I = 0.1 M$  (NaCl),  $pH = 7.0$ ,  $T = 25^\circ C$ .

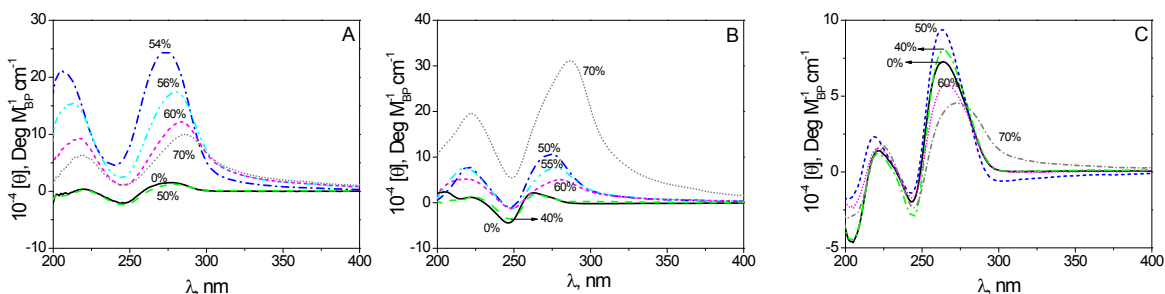

**Fig. 2S** CD spectra of the three polynucleotides, showing the variation of the molar ellipticity for different ethanol contents: (A) ct-DNA, (B) [poly(dA-dT)]<sub>2</sub> and (C) poly(rA)·poly(rU).  $C_P = 5 \times 10^{-5} M$ ,  $I = 0.1 M$  (NaCl),  $pH = 7.0$ ,  $T = 25^\circ C$ .

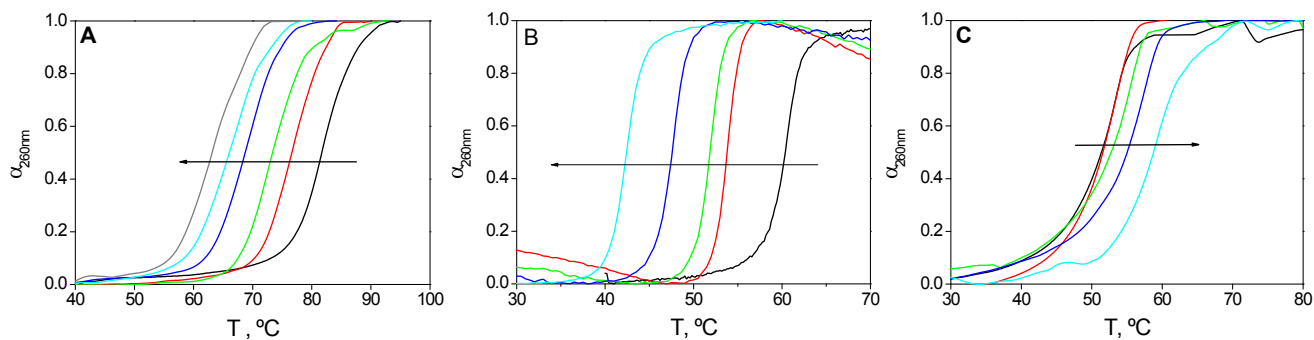

**Fig. 3S** Variation of  $\alpha$  as a function of temperature for: (A) ct-DNA, (B) [poly(dA-dT)]<sub>2</sub> and (C) poly(rA)·poly(rU) for ethanol contents: — 0, — 10, — 20, — 30, — 40, — 50% EtOH;  $C_P = 4 \times 10^{-5}$  M<sub>BP</sub>.  $I = 0.1$  M (NaCl),  $pH = 7.0$ . Scan rate =  $0.25$  °C·min<sup>-1</sup>.

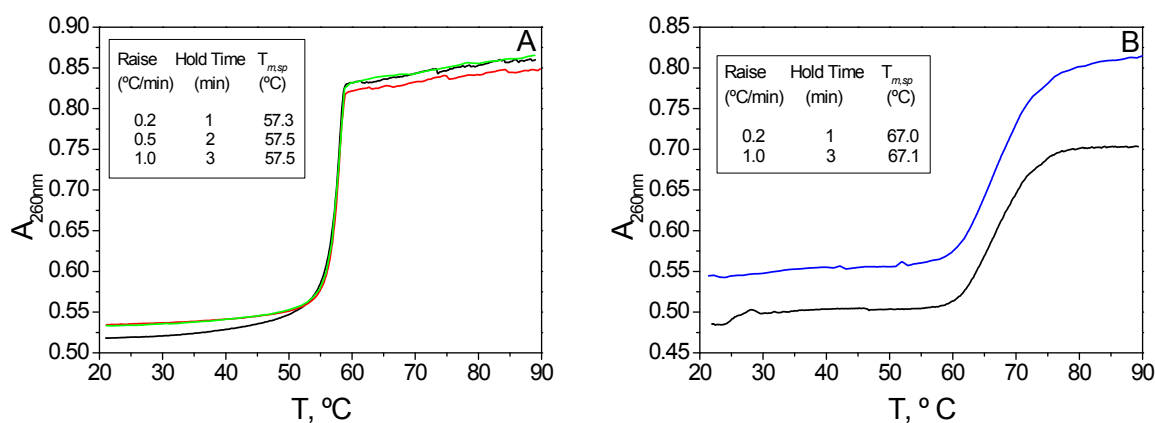

**Fig. 4S** (A) Poly(rA)·poly(rU) for 20 % (v/v) EtOH and scan rates: — 0.2, — 0.5, — 1.0 °C min<sup>-1</sup>;  $C_P = 4 \times 10^{-5}$  M<sub>BP</sub>.  $I = 0.1$  M (NaCl),  $pH = 7.0$ . (B) ct-DNA for 40 % (v/v) EtOH and scan rates: — 0.2, and — 1.0 °C min<sup>-1</sup>;  $C_P = 4 \times 10^{-5}$  M<sub>BP</sub>.  $I = 0.1$  M (NaCl),  $pH = 7.0$ .

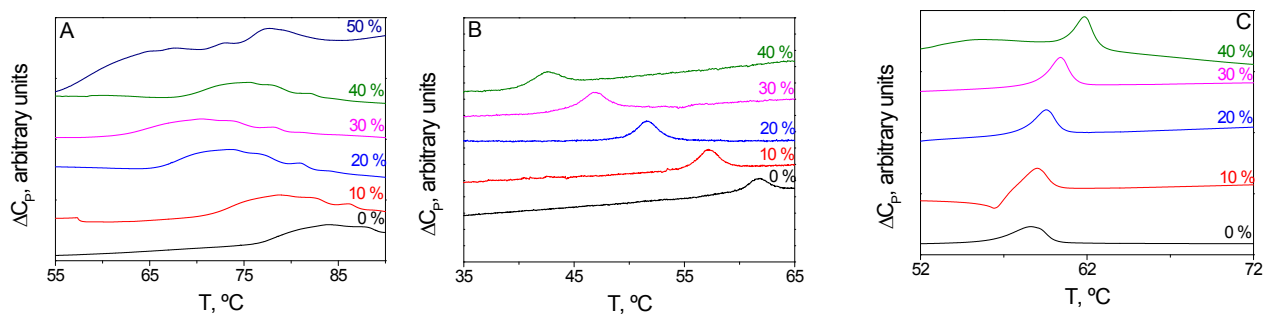

**Fig. 5S** DSC thermograms recorded for denaturation of (A) ct-DNA, (B) [poly(dA-dT)]<sub>2</sub> and (C) poly(rA)·poly(rU) for different ethanol contents.  $C_p = 1 \times 10^{-3} \text{ M}_{\text{BP}}$ ,  $I = 0.1 \text{ M}$  (NaCl),  $\text{pH} = 7.0$ . scan rate  $1 \text{ }^{\circ}\text{C min}^{-1}$  and  $P = 1 \text{ atm}$ .

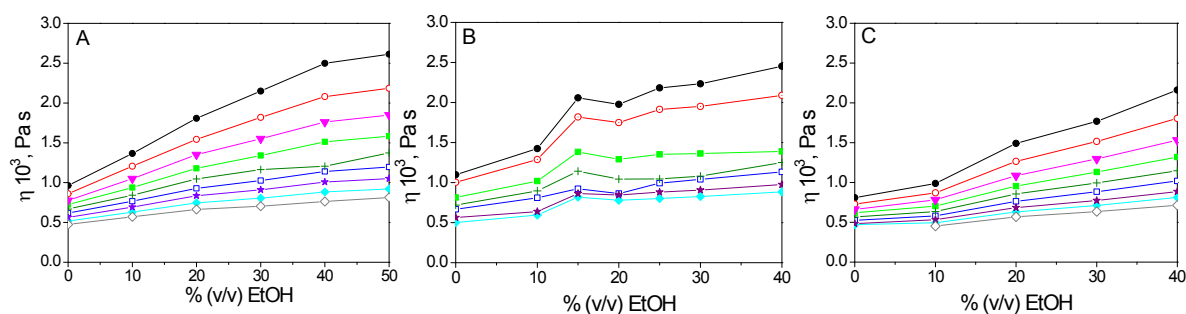

**Fig. 6S** Measured viscosity,  $\eta$  (Pa s), for polynucleotide solutions as a function of % (v/v) EtOH at working temperatures: (●)25, (○)30, (▼)35, (■)40, (⊕)45, (□)50, (★)55, (◆)60 and (⊛)65  $^{\circ}\text{C}$ . (A) ct-DNA, (B) [poly(dA-dT)]<sub>2</sub> and (C) poly(rA)·poly(rU).  $C_p = 5 \times 10^{-4} \text{ M}_{\text{BP}}$ ,  $I = 0.1 \text{ M}$  (NaCl),  $\text{pH} = 7.0$ .

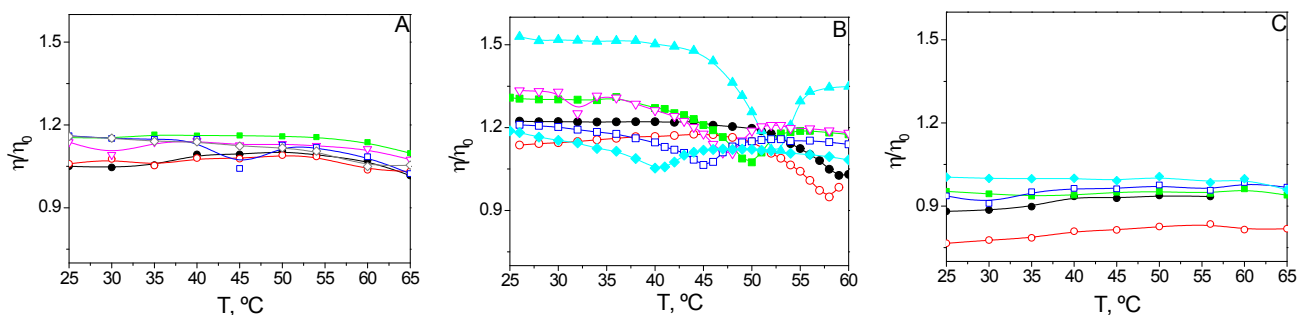

**Fig. 7S** Variation of the relative viscosity  $\eta/\eta_0$  as a function of temperature for different ethanol contents: (●)0, (○)10, (▲)15, (■)20, (◆)25, (□)30, (◇)40 and (◇)50% (v/v) EtOH. (A) ct-DNA, (B) [poly(dA-dT)]<sub>2</sub> and (C) poly(rA)·poly(rU).  $C_p = 5 \times 10^{-4} \text{ M}_{\text{BP}}$ ,  $I = 0.1 \text{ M}$  (NaCl),  $\text{pH} = 7.0$

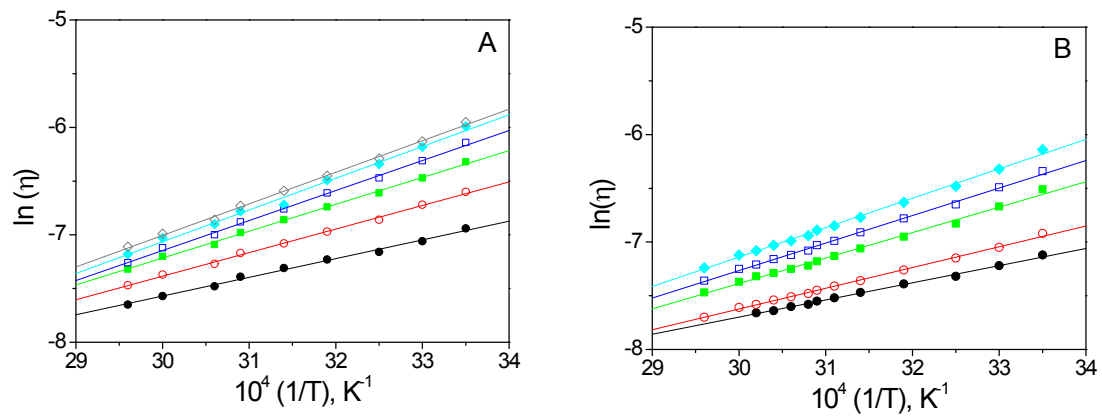

**Fig. 8S** Plot and fitting of eqn (11), (A) ct-DNA and (B) poly(rA)·poly(rU) for different ethanol-water mixtures: (●)0.0, (○)10, (■)20, (□)30, (◆)40 and (◇)50% EtOH/water.  $C_p = 5 \times 10^{-4} M_{BP}$ ,  $I = 0.1 M$  (NaCl),  $pH = 7.0$ .

**Table S.1.**Measured values of  $\rho_0$ , and  $u_0$  for neat solvent in the 25 to 65 °C temperature range.  $I = 0.1$  M (NaCl),  $pH = 7.0$ .

| $T$<br>(°C) | 0% (v/v) EtOH                     |                               | 10% (v/v) EtOH                    |                               | 20% (v/v) EtOH                    |                               | 30% (v/v) EtOH                    |                               | 40% (v/v) EtOH                    |                               | 50% (v/v) EtOH                    |                               |
|-------------|-----------------------------------|-------------------------------|-----------------------------------|-------------------------------|-----------------------------------|-------------------------------|-----------------------------------|-------------------------------|-----------------------------------|-------------------------------|-----------------------------------|-------------------------------|
|             | $\rho_0$<br>(g cm <sup>-3</sup> ) | $u_0$<br>(m s <sup>-1</sup> ) | $\rho_0$<br>(g cm <sup>-3</sup> ) | $u_0$<br>(m s <sup>-1</sup> ) | $\rho_0$<br>(g cm <sup>-3</sup> ) | $u_0$<br>(m s <sup>-1</sup> ) | $\rho_0$<br>(g cm <sup>-3</sup> ) | $u_0$<br>(m s <sup>-1</sup> ) | $\rho_0$<br>(g cm <sup>-3</sup> ) | $u_0$<br>(m s <sup>-1</sup> ) | $\rho_0$<br>(g cm <sup>-3</sup> ) | $u_0$<br>(m s <sup>-1</sup> ) |
| 25.00       | 1.001308                          | 1503.80                       | 0.988519                          | 1556.82                       | 0.978588                          | 1601.44                       | 0.968077                          | 1623.41                       | 0.951741                          | 1597.02                       | 0.932955                          | 1538.24                       |
| 26.00       | 1.001036                          | 1506.43                       | 0.988214                          | 1558.09                       | 0.978181                          | 1601.47                       | 0.967558                          | 1622.00                       | 0.951071                          | 1594.75                       | 0.932192                          | 1535.61                       |
| 27.00       | 1.000743                          | 1508.92                       | 0.987902                          | 1559.17                       | 0.977779                          | 1601.47                       | 0.967031                          | 1620.61                       | 0.950391                          | 1592.44                       | 0.931431                          | 1533.05                       |
| 28.00       | 1.000436                          | 1511.38                       | 0.987582                          | 1560.12                       | 0.977370                          | 1601.44                       | 0.966498                          | 1619.19                       | 0.949709                          | 1590.08                       | 0.930665                          | 1530.48                       |
| 29.00       | 1.000135                          | 1513.75                       | 0.987252                          | 1560.96                       | 0.976951                          | 1601.36                       | 0.965961                          | 1617.77                       | 0.949021                          | 1587.73                       | 0.929898                          | 1527.93                       |
| 30.00       | 0.999839                          | 1516.06                       | 0.986913                          | 1561.71                       | 0.976525                          | 1601.23                       | 0.965417                          | 1616.32                       | 0.948331                          | 1585.37                       | 0.929127                          | 1525.38                       |
| 31.00       | 0.999529                          | 1518.29                       | 0.986565                          | 1562.54                       | 0.976088                          | 1601.08                       | 0.964866                          | 1614.81                       | 0.947636                          | 1583.00                       | 0.928353                          | 1522.87                       |
| 32.00       | 0.999211                          | 1520.45                       | 0.986211                          | 1563.36                       | 0.975657                          | 1600.89                       | 0.964309                          | 1613.33                       | 0.946939                          | 1580.64                       | 0.927579                          | 1520.42                       |
| 33.00       | 0.998889                          | 1522.53                       | 0.985847                          | 1564.17                       | 0.975212                          | 1600.65                       | 0.963743                          | 1611.83                       | 0.946238                          | 1578.24                       | 0.926802                          | 1517.97                       |
| 34.00       | 0.998555                          | 1524.55                       | 0.985474                          | 1565.01                       | 0.974755                          | 1600.38                       | 0.963176                          | 1610.32                       | 0.945533                          | 1575.85                       | 0.926018                          | 1515.44                       |
| 35.00       | 0.998215                          | 1526.52                       | 0.985093                          | 1565.89                       | 0.974294                          | 1600.08                       | 0.962601                          | 1608.79                       | 0.944824                          | 1573.44                       | 0.925234                          | 1512.83                       |
| 36.00       | 0.997881                          | 1528.41                       | 0.984705                          | 1566.75                       | 0.973826                          | 1599.69                       | 0.962020                          | 1607.27                       | 0.944111                          | 1571.04                       | 0.924447                          | 1510.24                       |
| 37.00       | 0.997540                          | 1530.25                       | 0.984307                          | 1567.57                       | 0.973348                          | 1599.26                       | 0.961434                          | 1605.70                       | 0.943396                          | 1568.66                       | 0.923657                          | 1507.62                       |
| 38.00       | 0.997201                          | 1532.04                       | 0.983903                          | 1568.34                       | 0.972863                          | 1598.84                       | 0.960840                          | 1604.09                       | 0.942675                          | 1566.25                       | 0.922866                          | 1504.99                       |
| 39.00       | 0.996849                          | 1533.74                       | 0.983490                          | 1569.07                       | 0.972374                          | 1598.37                       | 0.960241                          | 1602.46                       | 0.941952                          | 1563.83                       | 0.922071                          | 1502.35                       |
| 40.00       | 0.996485                          | 1535.39                       | 0.983073                          | 1569.77                       | 0.971876                          | 1597.87                       | 0.959639                          | 1600.84                       | 0.941227                          | 1561.42                       | 0.921272                          | 1499.71                       |
| 41.00       | 0.996117                          | 1536.99                       | 0.982644                          | 1570.41                       | 0.971370                          | 1597.33                       | 0.959028                          | 1599.19                       | 0.940496                          | 1558.95                       | 0.920473                          | 1497.04                       |
| 42.00       | 0.995738                          | 1538.53                       | 0.982208                          | 1571.01                       | 0.970858                          | 1596.77                       | 0.958414                          | 1597.51                       | 0.939762                          | 1556.52                       | 0.919673                          | 1494.37                       |
| 43.00       | 0.995352                          | 1540.01                       | 0.981768                          | 1571.56                       | 0.970340                          | 1596.17                       | 0.957791                          | 1595.87                       | 0.939022                          | 1554.06                       | 0.918865                          | 1491.69                       |
| 44.00       | 0.994952                          | 1541.43                       | 0.981319                          | 1572.07                       | 0.969814                          | 1595.53                       | 0.957167                          | 1594.15                       | 0.938282                          | 1551.59                       | 0.918057                          | 1489.04                       |
| 45.00       | 0.994546                          | 1542.80                       | 0.980864                          | 1572.54                       | 0.969281                          | 1594.86                       | 0.956535                          | 1592.44                       | 0.937538                          | 1549.12                       | 0.917247                          | 1486.38                       |
| 46.00       | 0.994131                          | 1544.10                       | 0.980401                          | 1572.96                       | 0.968744                          | 1594.16                       | 0.955899                          | 1590.78                       | 0.936790                          | 1546.65                       | 0.916433                          | 1483.69                       |
| 47.00       | 0.993706                          | 1545.35                       | 0.979933                          | 1573.33                       | 0.968197                          | 1593.37                       | 0.955258                          | 1588.98                       | 0.936037                          | 1544.16                       | 0.915615                          | 1480.99                       |
| 48.00       | 0.993271                          | 1546.54                       | 0.979457                          | 1573.66                       | 0.967645                          | 1592.59                       | 0.954610                          | 1587.18                       | 0.935282                          | 1541.66                       | 0.914797                          | 1478.30                       |
| 49.00       | 0.992828                          | 1547.68                       | 0.978976                          | 1573.95                       | 0.967089                          | 1591.78                       | 0.953957                          | 1585.35                       | 0.934522                          | 1539.18                       | 0.913974                          | 1475.62                       |
| 50.00       | 0.992376                          | 1548.78                       | 0.978491                          | 1574.19                       | 0.966523                          | 1590.90                       | 0.953300                          | 1583.52                       | 0.933760                          | 1536.69                       | 0.913145                          | 1472.96                       |
| 51.00       | 0.991918                          | 1549.81                       | 0.978001                          | 1574.39                       | 0.965954                          | 1590.01                       | 0.952638                          | 1581.66                       | 0.932993                          | 1534.22                       | 0.912318                          | 1470.30                       |
| 52.00       | 0.991451                          | 1550.80                       | 0.977503                          | 1574.55                       | 0.965378                          | 1589.09                       | 0.951971                          | 1579.82                       | 0.932220                          | 1531.77                       | 0.911484                          | 1467.60                       |
| 53.00       | 0.990981                          | 1551.72                       | 0.977010                          | 1574.67                       | 0.964795                          | 1588.13                       | 0.951298                          | 1578.00                       | 0.931447                          | 1529.31                       | 0.910650                          | 1464.91                       |
| 54.00       | 0.990501                          | 1552.60                       | 0.976511                          | 1574.75                       | 0.964209                          | 1587.14                       | 0.950620                          | 1576.13                       | 0.930673                          | 1526.79                       | 0.909814                          | 1462.21                       |
| 55.00       | 0.990018                          | 1553.43                       | 0.976012                          | 1574.77                       | 0.963615                          | 1586.09                       | 0.949941                          | 1574.26                       | 0.929893                          | 1524.27                       | 0.908973                          | 1459.51                       |
| 56.00       | 0.989528                          | 1554.21                       | 0.975518                          | 1574.75                       | 0.963016                          | 1585.06                       | 0.949252                          | 1572.43                       | 0.929110                          | 1521.75                       | 0.908128                          | 1456.73                       |
| 57.00       | 0.989032                          | 1554.93                       | 0.975029                          | 1574.70                       | 0.962410                          | 1583.97                       | 0.948561                          | 1570.55                       | 0.928319                          | 1519.20                       | 0.907282                          | 1454.03                       |
| 58.00       | 0.988530                          | 1555.62                       | 0.974524                          | 1574.59                       | 0.961798                          | 1582.88                       | 0.947865                          | 1568.65                       | 0.927529                          | 1516.66                       | 0.906435                          | 1451.32                       |
| 59.00       | 0.988020                          | 1556.25                       | 0.974025                          | 1574.46                       | 0.961181                          | 1581.73                       | 0.947165                          | 1566.78                       | 0.926732                          | 1514.12                       | 0.905583                          | 1448.63                       |
| 60.00       | 0.987507                          | 1556.85                       | 0.973528                          | 1574.28                       | 0.960558                          | 1580.58                       | 0.946462                          | 1564.92                       | 0.925934                          | 1511.57                       | 0.904724                          | 1445.96                       |
| 61.00       | 0.986989                          | 1557.40                       | 0.973029                          | 1574.06                       | 0.959930                          | 1579.41                       | 0.945752                          | 1563.22                       | 0.925130                          | 1509.04                       | 0.903866                          | 1443.25                       |
| 62.00       | 0.986462                          | 1557.90                       | 0.972528                          | 1573.85                       | 0.959296                          | 1578.21                       | 0.945040                          | 1561.77                       | 0.924325                          | 1506.63                       | 0.903005                          | 1440.66                       |
| 63.00       | 0.985930                          | 1558.37                       | 0.972029                          | 1573.56                       | 0.958656                          | 1576.98                       | 0.944323                          | 1559.82                       | 0.923513                          | 1504.41                       | 0.902139                          | 1437.96                       |
| 64.00       | 0.985386                          | 1558.79                       | 0.971529                          | 1573.20                       | 0.958010                          | 1575.73                       | 0.943595                          | 1557.95                       | 0.922700                          | 1502.47                       | 0.901275                          | 1435.29                       |
| 65.00       | 0.984811                          | 1559.14                       | 0.971018                          | 1572.93                       | 0.957359                          | 1574.44                       | 0.942858                          | 1555.98                       | 0.921884                          | 1500.49                       | 0.900404                          | 1432.65                       |

**Table S.2.**

Measured and calculated values for  $\rho$ ,  $u$ ,  $[U]$ ,  $\phi V$ ,  $\phi K_S$ ,  $\alpha$ ,  $K_S$  and  $\beta_{S0}$  in the 25 to 65 °C temperature range. [poly(dA-dT)]<sub>2</sub> at 0% (v/v) EtOH.  $C_p = 5.00 \times 10^{-4}$  M<sub>BP</sub>,  $I = 0.1$  M (NaCl),  $pH = 7.0$ .

| $T$<br>(°C) | $\rho$<br>(g cm <sup>-3</sup> ) | $u$<br>(m s <sup>-1</sup> ) | $[U]$<br>(cm <sup>3</sup> mol <sup>-1</sup> ) | $\phi V$<br>(cm <sup>3</sup> mol <sup>-1</sup> ) | $10^2 \times \phi K_S$<br>(cm <sup>3</sup> mol <sup>-1</sup> bar <sup>-1</sup> ) | $10^4 \times \alpha$<br>(K <sup>-1</sup> ) | $10^5 \times K_S$<br>(bar <sup>-1</sup> ) | $10^5 \times \beta_{S0}$<br>(bar <sup>-1</sup> ) |
|-------------|---------------------------------|-----------------------------|-----------------------------------------------|--------------------------------------------------|----------------------------------------------------------------------------------|--------------------------------------------|-------------------------------------------|--------------------------------------------------|
| 25.00       | 1.001887                        | 1504.05                     | 997.80                                        | -391.47                                          | -15.15                                                                           | 2.56                                       | 4.4122                                    | 4.4189                                           |
| 26.00       | 1.001620                        | 1506.70                     | 1049.20                                       | -401.56                                          | -15.64                                                                           | 2.77                                       | 4.3979                                    | 4.4048                                           |
| 27.00       | 1.001338                        | 1509.21                     | 1047.45                                       | -393.68                                          | -15.51                                                                           | 2.86                                       | 4.3845                                    | 4.3914                                           |
| 28.00       | 1.001050                        | 1511.66                     | 1059.00                                       | -395.79                                          | -15.58                                                                           | 2.92                                       | 4.3716                                    | 4.3785                                           |
| 29.00       | 1.000753                        | 1514.03                     | 1057.34                                       | -393.91                                          | -15.51                                                                           | 3.04                                       | 4.3592                                    | 4.3661                                           |
| 30.00       | 1.000448                        | 1516.35                     | 1082.13                                       | -396.03                                          | -15.70                                                                           | 3.10                                       | 4.3472                                    | 4.3542                                           |
| 31.00       | 1.000134                        | 1518.58                     | 1067.36                                       | -396.15                                          | -15.53                                                                           | 3.17                                       | 4.3358                                    | 4.3427                                           |
| 32.00       | 0.999812                        | 1520.75                     | 1065.83                                       | -394.28                                          | -15.47                                                                           | 3.26                                       | 4.3248                                    | 4.3317                                           |
| 33.00       | 0.999483                        | 1522.86                     | 1077.50                                       | -402.42                                          | -15.60                                                                           | 3.30                                       | 4.3142                                    | 4.3212                                           |
| 34.00       | 0.999149                        | 1524.88                     | 1062.94                                       | -408.56                                          | -15.49                                                                           | 3.44                                       | 4.3043                                    | 4.3111                                           |
| 35.00       | 0.998801                        | 1526.81                     | 1022.26                                       | -404.70                                          | -15.08                                                                           | 3.46                                       | 4.2949                                    | 4.3015                                           |
| 36.00       | 0.998450                        | 1528.70                     | 1007.90                                       | -412.86                                          | -14.99                                                                           | 3.56                                       | 4.2858                                    | 4.2924                                           |
| 37.00       | 0.998090                        | 1530.55                     | 1006.68                                       | -417.02                                          | -14.99                                                                           | 3.62                                       | 4.2770                                    | 4.2836                                           |
| 38.00       | 0.997728                        | 1532.33                     | 1005.51                                       | -431.21                                          | -15.07                                                                           | 3.70                                       | 4.2686                                    | 4.2752                                           |
| 39.00       | 0.997356                        | 1534.05                     | 1004.38                                       | -437.39                                          | -15.09                                                                           | 3.75                                       | 4.2606                                    | 4.2672                                           |
| 40.00       | 0.996978                        | 1535.71                     | 1016.33                                       | -451.61                                          | -15.28                                                                           | 3.82                                       | 4.2530                                    | 4.2597                                           |
| 41.00       | 0.996590                        | 1537.31                     | 1002.25                                       | -455.81                                          | -15.18                                                                           | 3.90                                       | 4.2458                                    | 4.2524                                           |
| 42.00       | 0.996204                        | 1538.76                     | 884.22                                        | -482.10                                          | -14.37                                                                           | 3.92                                       | 4.2395                                    | 4.2456                                           |
| 43.00       | 0.995809                        | 1540.25                     | 896.36                                        | -502.39                                          | -14.63                                                                           | 4.00                                       | 4.2329                                    | 4.2392                                           |
| 44.00       | 0.995409                        | 1541.68                     | 908.51                                        | -528.74                                          | -14.93                                                                           | 4.04                                       | 4.2268                                    | 4.2331                                           |
| 45.00       | 0.995000                        | 1543.05                     | 894.73                                        | -549.07                                          | -14.97                                                                           | 4.16                                       | 4.2210                                    | 4.2273                                           |
| 46.00       | 0.994584                        | 1544.37                     | 906.93                                        | -567.42                                          | -15.21                                                                           | 4.21                                       | 4.2156                                    | 4.2220                                           |
| 47.00       | 0.994162                        | 1545.61                     | 880.30                                        | -587.79                                          | -15.14                                                                           | 4.30                                       | 4.2106                                    | 4.2169                                           |
| 48.00       | 0.993732                        | 1546.82                     | 892.55                                        | -608.19                                          | -15.40                                                                           | 4.36                                       | 4.2058                                    | 4.2122                                           |
| 49.00       | 0.993297                        | 1547.96                     | 878.96                                        | -632.64                                          | -15.48                                                                           | 4.40                                       | 4.2015                                    | 4.2079                                           |
| 50.00       | 0.992855                        | 1549.06                     | 1059.27                                       | -645.02                                          | -17.09                                                                           | 4.50                                       | 4.1974                                    | 4.2046                                           |
| 51.00       | 0.992404                        | 1550.10                     | 1006.89                                       | -647.34                                          | -16.65                                                                           | 4.56                                       | 4.1936                                    | 4.2006                                           |
| 52.00       | 0.991948                        | 1551.09                     | 1006.25                                       | -669.83                                          | -16.82                                                                           | 4.64                                       | 4.1902                                    | 4.1972                                           |
| 53.00       | 0.991485                        | 1552.04                     | 1031.43                                       | -684.28                                          | -17.14                                                                           | 4.69                                       | 4.1870                                    | 4.1942                                           |
| 54.00       | 0.991018                        | 1552.94                     | 1056.62                                       | -704.81                                          | -17.52                                                                           | 4.78                                       | 4.1842                                    | 4.1914                                           |
| 55.00       | 0.990541                        | 1553.79                     | 1094.70                                       | -721.31                                          | -17.97                                                                           | 5.84                                       | 4.1816                                    | 4.1891                                           |
| 56.00       | 0.990058                        | 1554.60                     | 1145.64                                       | -729.76                                          | -18.46                                                                           | 3.90                                       | 4.1793                                    | 4.1870                                           |
| 57.00       | 0.989570                        | 1555.34                     | 1157.97                                       | -750.35                                          | -18.72                                                                           | 4.99                                       | 4.1774                                    | 4.1852                                           |
| 58.00       | 0.989072                        | 1556.04                     | 1183.19                                       | -756.80                                          | -18.98                                                                           | 5.06                                       | 4.1757                                    | 4.1836                                           |
| 59.00       | 0.988567                        | 1556.69                     | 1208.42                                       | -761.24                                          | -19.23                                                                           | 5.12                                       | 4.1744                                    | 4.1824                                           |
| 60.00       | 0.988057                        | 1557.32                     | 1272.22                                       | -769.74                                          | -19.83                                                                           | 5.22                                       | 4.1731                                    | 4.1814                                           |
| 61.00       | 0.987540                        | 1557.89                     | 1297.47                                       | -774.19                                          | -20.08                                                                           | 5.27                                       | 4.1723                                    | 4.1807                                           |
| 62.00       | 0.987020                        | 1558.25                     | 1107.70                                       | -784.74                                          | -18.58                                                                           | 5.31                                       | 4.1725                                    | 4.1802                                           |
| 63.00       | 0.986490                        | 1558.64                     | 1030.18                                       | -785.17                                          | -17.93                                                                           | 5.37                                       | 4.1727                                    | 4.1800                                           |
| 64.00       | 0.985950                        | 1559.32                     | 1360.49                                       | -777.47                                          | -20.63                                                                           | 5.41                                       | 4.1713                                    | 4.1800                                           |
| 65.00       | 0.985410                        | 1559.71                     | 1385.83                                       | -779.93                                          | -20.87                                                                           | 5.52                                       | 4.1715                                    | 4.1803                                           |

**Table S.3.**

Measured and calculated values for  $\rho$ ,  $u$ ,  $[U]$ ,  $\phi V$ ,  $\phi K_S$ ,  $\alpha$ ,  $K_S$  and  $\beta_{S0}$  in the 25 to 65 °C temperature range. [poly(dA-dT)]<sub>2</sub> at 10% (v/v) EtOH.  $C_P = 5.04 \times 10^{-4}$  M<sub>BP</sub>,  $I = 0.1$  M (NaCl),  $pH = 7.0$ .

| $T$<br>(°C) | $\rho$<br>(g cm <sup>-3</sup> ) | $u$<br>(m s <sup>-1</sup> ) | $[U]$<br>(cm <sup>3</sup> mol <sup>-1</sup> ) | $\phi V$<br>(cm <sup>3</sup> mol <sup>-1</sup> ) | $10^2 \times \phi K_S$<br>(cm <sup>3</sup> mol <sup>-1</sup> bar <sup>-1</sup> ) | $10^4 \times \alpha$<br>(K <sup>-1</sup> ) | $10^5 \times K_S$<br>(bar <sup>-1</sup> ) | $10^5 \times \beta_{S0}$<br>(bar <sup>-1</sup> ) |
|-------------|---------------------------------|-----------------------------|-----------------------------------------------|--------------------------------------------------|----------------------------------------------------------------------------------|--------------------------------------------|-------------------------------------------|--------------------------------------------------|
| 25.00       | 0.990470                        | 1550.34                     | -102.40                                       | -55.08                                           | -2.36                                                                            | 2.97                                       | 4.2005                                    | 4.2016                                           |
| 26.00       | 0.990176                        | 1551.89                     | -127.88                                       | -59.11                                           | -2.18                                                                            | 3.01                                       | 4.1934                                    | 4.1944                                           |
| 27.00       | 0.989871                        | 1553.39                     | -114.98                                       | -61.13                                           | -2.30                                                                            | 3.13                                       | 4.1866                                    | 4.1876                                           |
| 28.00       | 0.989556                        | 1554.83                     | -76.58                                        | -57.14                                           | -2.58                                                                            | 3.22                                       | 4.1802                                    | 4.1814                                           |
| 29.00       | 0.989233                        | 1556.20                     | -102.02                                       | -63.18                                           | -2.42                                                                            | 3.30                                       | 4.1742                                    | 4.1753                                           |
| 30.00       | 0.988901                        | 1557.53                     | -76.45                                        | -65.21                                           | -2.65                                                                            | 3.41                                       | 4.1684                                    | 4.1696                                           |
| 31.00       | 0.988562                        | 1558.79                     | -76.39                                        | -69.25                                           | -2.68                                                                            | 3.49                                       | 4.1631                                    | 4.1643                                           |
| 32.00       | 0.988212                        | 1560.00                     | -63.61                                        | -65.25                                           | -2.75                                                                            | 3.57                                       | 4.1582                                    | 4.1594                                           |
| 33.00       | 0.987854                        | 1561.15                     | -76.27                                        | -67.29                                           | -2.66                                                                            | 3.66                                       | 4.1535                                    | 4.1547                                           |
| 34.00       | 0.987490                        | 1562.26                     | -38.11                                        | -69.32                                           | -2.99                                                                            | 3.76                                       | 4.1492                                    | 4.1505                                           |
| 35.00       | 0.987116                        | 1563.30                     | -38.08                                        | -69.35                                           | -2.99                                                                            | 3.81                                       | 4.1452                                    | 4.1466                                           |
| 36.00       | 0.986733                        | 1564.29                     | -38.06                                        | -67.36                                           | -2.97                                                                            | 3.91                                       | 4.1416                                    | 4.1429                                           |
| 37.00       | 0.986343                        | 1565.23                     | -25.36                                        | -65.38                                           | -3.06                                                                            | 3.99                                       | 4.1382                                    | 4.1396                                           |
| 38.00       | 0.985946                        | 1566.11                     | -25.34                                        | -67.42                                           | -3.08                                                                            | 4.08                                       | 4.1353                                    | 4.1367                                           |
| 39.00       | 0.985541                        | 1566.95                     | -25.33                                        | -69.46                                           | -3.09                                                                            | 4.17                                       | 4.1325                                    | 4.1339                                           |
| 40.00       | 0.985127                        | 1567.74                     | -12.66                                        | -63.44                                           | -3.15                                                                            | 4.22                                       | 4.1301                                    | 4.1315                                           |
| 41.00       | 0.984706                        | 1568.47                     | 0.00                                          | -65.49                                           | -3.27                                                                            | 4.31                                       | 4.1280                                    | 4.1295                                           |
| 42.00       | 0.984279                        | 1569.15                     | 0.00                                          | -63.50                                           | -3.25                                                                            | 4.37                                       | 4.1262                                    | 4.1277                                           |
| 43.00       | 0.983843                        | 1569.79                     | 12.64                                         | -63.52                                           | -3.36                                                                            | 4.47                                       | 4.1247                                    | 4.1262                                           |
| 44.00       | 0.983401                        | 1570.37                     | 25.28                                         | -59.52                                           | -3.43                                                                            | 4.55                                       | 4.1235                                    | 4.1251                                           |
| 45.00       | 0.982952                        | 1570.91                     | 37.90                                         | -59.54                                           | -3.53                                                                            | 4.60                                       | 4.1225                                    | 4.1242                                           |
| 46.00       | 0.982494                        | 1571.39                     | 63.15                                         | -51.49                                           | -3.67                                                                            | 4.70                                       | 4.1219                                    | 4.1237                                           |
| 47.00       | 0.982031                        | 1571.84                     | 75.76                                         | -51.51                                           | -3.78                                                                            | 4.78                                       | 4.1215                                    | 4.1233                                           |
| 48.00       | 0.981560                        | 1572.23                     | 88.36                                         | -49.51                                           | -3.87                                                                            | 4.82                                       | 4.1215                                    | 4.1233                                           |
| 49.00       | 0.981083                        | 1572.59                     | 100.97                                        | -47.51                                           | -3.96                                                                            | 4.89                                       | 4.1216                                    | 4.1235                                           |
| 50.00       | 0.980595                        | 1572.88                     | 88.33                                         | -43.49                                           | -3.82                                                                            | 4.96                                       | 4.1221                                    | 4.1239                                           |
| 51.00       | 0.980106                        | 1573.14                     | 100.93                                        | -41.48                                           | -3.91                                                                            | 5.08                                       | 4.1228                                    | 4.1247                                           |
| 52.00       | 0.979607                        | 1573.35                     | 100.92                                        | -41.51                                           | -3.91                                                                            | 5.09                                       | 4.1238                                    | 4.1257                                           |
| 53.00       | 0.979103                        | 1573.43                     | -37.84                                        | -37.47                                           | -2.74                                                                            | 5.21                                       | 4.1255                                    | 4.1268                                           |
| 54.00       | 0.978592                        | 1573.66                     | 75.67                                         | -35.46                                           | -3.66                                                                            | 5.25                                       | 4.1264                                    | 4.1282                                           |
| 55.00       | 0.978075                        | 1573.75                     | 37.83                                         | -33.45                                           | -3.33                                                                            | 5.00                                       | 4.1282                                    | 4.1298                                           |
| 56.00       | 0.977550                        | 1573.81                     | 37.83                                         | -29.41                                           | -3.30                                                                            | 5.72                                       | 4.1301                                    | 4.1317                                           |
| 57.00       | 0.977017                        | 1573.80                     | 12.61                                         | -21.30                                           | -3.03                                                                            | 5.48                                       | 4.1324                                    | 4.1338                                           |
| 58.00       | 0.976482                        | 1573.76                     | 0.00                                          | -19.27                                           | -2.91                                                                            | 5.50                                       | 4.1348                                    | 4.1363                                           |
| 59.00       | 0.975939                        | 1573.69                     | -12.61                                        | -19.28                                           | -2.81                                                                            | 5.58                                       | 4.1375                                    | 4.1389                                           |
| 60.00       | 0.975391                        | 1573.57                     | -25.22                                        | -15.22                                           | -2.68                                                                            | 5.70                                       | 4.1405                                    | 4.1418                                           |
| 61.00       | 0.974834                        | 1573.42                     | -25.23                                        | -13.20                                           | -2.66                                                                            | 5.71                                       | 4.1436                                    | 4.1449                                           |
| 62.00       | 0.974274                        | 1573.24                     | -12.61                                        | -9.13                                            | -2.74                                                                            | 5.78                                       | 4.1470                                    | 4.1483                                           |
| 63.00       | 0.973708                        | 1573.03                     | 0.00                                          | -15.25                                           | -2.90                                                                            | 5.86                                       | 4.1505                                    | 4.1519                                           |
| 64.00       | 0.973133                        | 1572.77                     | 151.43                                        | -47.90                                           | -4.43                                                                            | 5.92                                       | 4.1543                                    | 4.1564                                           |
| 65.00       | 0.972554                        | 1572.48                     | 201.96                                        | -11.19                                           | -4.56                                                                            | 5.98                                       | 4.1583                                    | 4.1606                                           |

**Table S.4.**

Measured and calculated data of  $\rho$ ,  $u$ ,  $[U]$ ,  $\phi V$ ,  $\phi K_S$ ,  $\alpha$ ,  $K_S$  and  $\beta_{S0}$  in the 25 to 65 °C temperature range. [poly(dA-dT)]<sub>2</sub> at 15% (v/v) EtOH.  $C_P = 5.06 \times 10^{-4} \text{ M}_{BP}$ ,  $I = 0.1 \text{ M (NaCl)}$ ,  $pH = 7.0$ .

| $T$<br>(°C) | $\rho$<br>(g cm <sup>-3</sup> ) | $u$<br>(m s <sup>-1</sup> ) | $[U]$<br>(cm <sup>3</sup> mol <sup>-1</sup> ) | $\phi V$<br>(cm <sup>3</sup> mol <sup>-1</sup> ) | $10^2 \times \phi K_S$<br>(cm <sup>3</sup> mol <sup>-1</sup> bar <sup>-1</sup> ) | $10^4 \times \alpha$<br>(K <sup>-1</sup> ) | $10^5 \times K_S$<br>(bar <sup>-1</sup> ) | $10^5 \times \beta_{S0}$<br>(bar <sup>-1</sup> ) |
|-------------|---------------------------------|-----------------------------|-----------------------------------------------|--------------------------------------------------|----------------------------------------------------------------------------------|--------------------------------------------|-------------------------------------------|--------------------------------------------------|
| 25.00       | 0.983265                        | 1582.26                     | -399.40                                       | -359.63                                          | -2.36                                                                            | 3.23                                       | 4.0623                                    | 4.0628                                           |
| 26.00       | 0.982934                        | 1582.92                     | -386.76                                       | -385.90                                          | -2.68                                                                            | 3.51                                       | 4.0603                                    | 4.0609                                           |
| 27.00       | 0.982583                        | 1583.53                     | -374.14                                       | -392.07                                          | -2.83                                                                            | 3.62                                       | 4.0586                                    | 4.0592                                           |
| 28.00       | 0.982222                        | 1584.11                     | -349.08                                       | -392.21                                          | -3.04                                                                            | 3.74                                       | 4.0571                                    | 4.0579                                           |
| 29.00       | 0.981855                        | 1584.64                     | -324.04                                       | -402.43                                          | -3.32                                                                            | 3.79                                       | 4.0559                                    | 4.0568                                           |
| 30.00       | 0.981475                        | 1585.12                     | -286.57                                       | -398.55                                          | -3.60                                                                            | 3.89                                       | 4.0551                                    | 4.0561                                           |
| 31.00       | 0.981091                        | 1585.55                     | -298.94                                       | -408.78                                          | -3.58                                                                            | 3.98                                       | 4.0544                                    | 4.0554                                           |
| 32.00       | 0.980696                        | 1585.96                     | -261.51                                       | -410.97                                          | -3.90                                                                            | 4.06                                       | 4.0540                                    | 4.0551                                           |
| 33.00       | 0.980295                        | 1586.28                     | -273.91                                       | -421.22                                          | -3.88                                                                            | 4.13                                       | 4.0540                                    | 4.0551                                           |
| 34.00       | 0.979883                        | 1586.60                     | -224.07                                       | -417.36                                          | -4.26                                                                            | 4.24                                       | 4.0541                                    | 4.0554                                           |
| 35.00       | 0.979466                        | 1586.85                     | -224.03                                       | -427.63                                          | -4.34                                                                            | 4.30                                       | 4.0545                                    | 4.0558                                           |
| 36.00       | 0.979041                        | 1587.07                     | -199.12                                       | -435.89                                          | -4.62                                                                            | 4.40                                       | 4.0552                                    | 4.0566                                           |
| 37.00       | 0.978607                        | 1587.24                     | -186.65                                       | -438.10                                          | -4.74                                                                            | 4.47                                       | 4.0561                                    | 4.0576                                           |
| 38.00       | 0.978166                        | 1587.38                     | -149.31                                       | -444.36                                          | -5.09                                                                            | 4.53                                       | 4.0572                                    | 4.0589                                           |
| 39.00       | 0.977718                        | 1587.47                     | -124.42                                       | -450.63                                          | -5.35                                                                            | 4.61                                       | 4.0586                                    | 4.0604                                           |
| 40.00       | 0.977263                        | 1587.50                     | -124.42                                       | -456.91                                          | -5.40                                                                            | 4.72                                       | 4.0603                                    | 4.0621                                           |
| 41.00       | 0.976799                        | 1587.51                     | -99.53                                        | -463.20                                          | -5.66                                                                            | 4.78                                       | 4.0622                                    | 4.0641                                           |
| 42.00       | 0.976330                        | 1587.48                     | -74.65                                        | -469.50                                          | -5.92                                                                            | 4.85                                       | 4.0643                                    | 4.0663                                           |
| 43.00       | 0.975851                        | 1587.40                     | -62.21                                        | -473.78                                          | -6.06                                                                            | 4.92                                       | 4.0667                                    | 4.0688                                           |
| 44.00       | 0.975366                        | 1587.29                     | -24.89                                        | -478.07                                          | -6.41                                                                            | 5.02                                       | 4.0693                                    | 4.0716                                           |
| 45.00       | 0.974873                        | 1587.12                     | -49.78                                        | -486.42                                          | -6.28                                                                            | 5.09                                       | 4.0722                                    | 4.0744                                           |
| 46.00       | 0.974376                        | 1586.91                     | -12.45                                        | -492.76                                          | -6.64                                                                            | 5.16                                       | 4.0754                                    | 4.0777                                           |
| 47.00       | 0.973869                        | 1586.68                     | 12.45                                         | -497.07                                          | -6.88                                                                            | 5.22                                       | 4.0787                                    | 4.0811                                           |
| 48.00       | 0.973355                        | 1586.41                     | 37.35                                         | -499.37                                          | -7.11                                                                            | 5.32                                       | 4.0822                                    | 4.0848                                           |
| 49.00       | 0.972835                        | 1586.10                     | 62.27                                         | -503.70                                          | -7.36                                                                            | 5.38                                       | 4.0860                                    | 4.0887                                           |
| 50.00       | 0.972308                        | 1585.77                     | 74.74                                         | -506.00                                          | -7.49                                                                            | 5.45                                       | 4.0899                                    | 4.0927                                           |
| 51.00       | 0.971775                        | 1585.40                     | 137.06                                        | -506.28                                          | -8.01                                                                            | 5.53                                       | 4.0941                                    | 4.0971                                           |
| 52.00       | 0.971235                        | 1584.98                     | 149.56                                        | -514.71                                          | -8.20                                                                            | 5.59                                       | 4.0985                                    | 4.1016                                           |
| 53.00       | 0.970690                        | 1584.57                     | 249.34                                        | -517.03                                          | -9.05                                                                            | 5.67                                       | 4.1030                                    | 4.1065                                           |
| 54.00       | 0.970135                        | 1584.07                     | 224.48                                        | -517.33                                          | -8.86                                                                            | 5.74                                       | 4.1079                                    | 4.1113                                           |
| 55.00       | 0.969578                        | 1583.42                     | 112.28                                        | -523.74                                          | -8.00                                                                            | 5.78                                       | 4.1136                                    | 4.1166                                           |
| 56.00       | 0.969010                        | 1582.84                     | 37.44                                         | -522.01                                          | -7.38                                                                            | 5.88                                       | 4.1191                                    | 4.1217                                           |
| 57.00       | 0.968440                        | 1582.26                     | 62.42                                         | -528.44                                          | -7.65                                                                            | 5.93                                       | 4.1245                                    | 4.1273                                           |
| 58.00       | 0.967863                        | 1581.62                     | 62.45                                         | -530.80                                          | -7.68                                                                            | 5.99                                       | 4.1303                                    | 4.1331                                           |
| 59.00       | 0.967279                        | 1580.94                     | 62.47                                         | -529.07                                          | -7.68                                                                            | 6.06                                       | 4.1364                                    | 4.1391                                           |
| 60.00       | 0.966690                        | 1580.26                     | 100.00                                        | -539.62                                          | -8.09                                                                            | 6.13                                       | 4.1424                                    | 4.1454                                           |
| 61.00       | 0.966095                        | 1579.55                     | 312.68                                        | -542.00                                          | -9.89                                                                            | 6.19                                       | 4.1487                                    | 4.1526                                           |
| 62.00       | 0.965493                        | 1578.73                     | 262.78                                        | -542.34                                          | -9.50                                                                            | 6.26                                       | 4.1556                                    | 4.1593                                           |
| 63.00       | 0.964885                        | 1577.95                     | 300.47                                        | -554.98                                          | -9.94                                                                            | 6.31                                       | 4.1623                                    | 4.1662                                           |
| 64.00       | 0.964273                        | 1577.12                     | 313.16                                        | -559.43                                          | -10.10                                                                           | 6.40                                       | 4.1694                                    | 4.1733                                           |
| 65.00       | 0.963653                        | 1576.26                     | 325.87                                        | -520.81                                          | -9.90                                                                            | 6.45                                       | 4.1766                                    | 4.1805                                           |



**Table S.5.**

Measured and calculated values for  $\rho$ ,  $u$ ,  $[U]$ ,  $\phi V$ ,  $\phi K_S$ ,  $\alpha$ ,  $K_S$  and  $\beta_{S0}$  in the 25 to 65 °C temperature range. [poly(dA-dT)]<sub>2</sub> at 20% (v/v) EtOH.  $C_P = 5.09 \times 10^{-4}$  M<sub>BP</sub>,  $I = 0.1$  M (NaCl),  $pH = 7.0$ .

| $T$<br>(°C) | $\rho$<br>(g cm <sup>-3</sup> ) | $u$<br>(m s <sup>-1</sup> ) | $[U]$<br>(cm <sup>3</sup> mol <sup>-1</sup> ) | $\phi V$<br>(cm <sup>3</sup> mol <sup>-1</sup> ) | $10^2 \times \phi K_S$<br>(cm <sup>3</sup> mol <sup>-1</sup> bar <sup>-1</sup> ) | $10^4 \times \alpha$<br>(K <sup>-1</sup> ) | $10^5 \times K_S$<br>(bar <sup>-1</sup> ) | $10^5 \times \beta_{S0}$<br>(bar <sup>-1</sup> ) |
|-------------|---------------------------------|-----------------------------|-----------------------------------------------|--------------------------------------------------|----------------------------------------------------------------------------------|--------------------------------------------|-------------------------------------------|--------------------------------------------------|
| 25.00       | 0.977089                        | 1606.24                     | 6655.22                                       | 3500.76                                          | -27.81                                                                           | 4.18                                       | 0.3967                                    | 3.9880                                           |
| 26.00       | 0.976679                        | 1606.10                     | 6421.72                                       | 3550.37                                          | -25.56                                                                           | 4.24                                       | 0.3969                                    | 3.9893                                           |
| 27.00       | 0.976263                        | 1605.84                     | 6102.48                                       | 3586.00                                          | -22.74                                                                           | 4.29                                       | 0.3972                                    | 3.9909                                           |
| 28.00       | 0.975838                        | 1605.53                     | 5771.10                                       | 3623.69                                          | -19.80                                                                           | 4.38                                       | 0.3975                                    | 3.9928                                           |
| 29.00       | 0.975406                        | 1605.22                     | 5488.96                                       | 3663.46                                          | -17.24                                                                           | 4.49                                       | 0.3979                                    | 3.9949                                           |
| 30.00       | 0.974966                        | 1604.88                     | 5219.20                                       | 3695.25                                          | -14.84                                                                           | 4.54                                       | 0.3982                                    | 3.9972                                           |
| 31.00       | 0.974517                        | 1604.50                     | 4961.84                                       | 3733.13                                          | -12.49                                                                           | 4.66                                       | 0.3986                                    | 3.9998                                           |
| 32.00       | 0.974062                        | 1604.09                     | 4704.51                                       | 3769.06                                          | -10.16                                                                           | 4.71                                       | 0.3990                                    | 4.0026                                           |
| 33.00       | 0.973598                        | 1603.64                     | 4434.91                                       | 3803.04                                          | -7.73                                                                            | 4.81                                       | 0.3994                                    | 4.0056                                           |
| 34.00       | 0.973128                        | 1603.15                     | 4165.34                                       | 3837.08                                          | -5.31                                                                            | 4.85                                       | 0.3998                                    | 4.0088                                           |
| 35.00       | 0.972650                        | 1602.64                     | 3920.36                                       | 3869.17                                          | -3.09                                                                            | 4.97                                       | 0.4003                                    | 4.0123                                           |
| 36.00       | 0.972167                        | 1602.10                     | 3687.67                                       | 3897.27                                          | -1.00                                                                            | 5.03                                       | 0.4008                                    | 4.0160                                           |
| 37.00       | 0.971673                        | 1601.51                     | 3430.34                                       | 3933.52                                          | 1.36                                                                             | 5.11                                       | 0.4013                                    | 4.0199                                           |
| 38.00       | 0.970921                        | 1600.58                     | 2804.03                                       | 4479.01                                          | 10.79                                                                            | 5.20                                       | 0.4020                                    | 4.0261                                           |
| 39.00       | 0.970667                        | 1600.25                     | 2952.44                                       | 3998.11                                          | 5.73                                                                             | 5.26                                       | 0.4023                                    | 4.0283                                           |
| 40.00       | 0.970154                        | 1599.58                     | 2744.17                                       | 4032.52                                          | 7.69                                                                             | 5.31                                       | 0.4029                                    | 4.0329                                           |
| 41.00       | 0.969633                        | 1598.86                     | 2511.19                                       | 4069.02                                          | 9.88                                                                             | 5.40                                       | 0.4034                                    | 4.0377                                           |
| 42.00       | 0.969107                        | 1598.12                     | 2290.42                                       | 4095.47                                          | 11.89                                                                            | 5.47                                       | 0.4040                                    | 4.0426                                           |
| 43.00       | 0.968575                        | 1597.35                     | 2081.86                                       | 4126.02                                          | 13.84                                                                            | 5.53                                       | 0.4046                                    | 4.0478                                           |
| 44.00       | 0.968035                        | 1596.54                     | 2255.67                                       | 4158.66                                          | 12.71                                                                            | 5.62                                       | 0.4053                                    | 4.0548                                           |
| 45.00       | 0.967488                        | 1595.70                     | 1652.05                                       | 4189.34                                          | 17.87                                                                            | 5.65                                       | 0.4059                                    | 4.0589                                           |
| 46.00       | 0.966936                        | 1594.83                     | 1418.41                                       | 4218.05                                          | 20.03                                                                            | 5.79                                       | 0.4066                                    | 4.0646                                           |
| 47.00       | 0.966374                        | 1593.93                     | 1209.29                                       | 4254.94                                          | 22.06                                                                            | 5.79                                       | 0.4073                                    | 4.0706                                           |
| 48.00       | 0.965810                        | 1593.01                     | 1037.04                                       | 4283.77                                          | 23.73                                                                            | 5.91                                       | 0.4080                                    | 4.0769                                           |
| 49.00       | 0.965237                        | 1592.04                     | 815.22                                        | 4314.70                                          | 25.83                                                                            | 5.95                                       | 0.4088                                    | 4.0833                                           |
| 50.00       | 0.964658                        | 1591.05                     | 617.91                                        | 4351.79                                          | 27.79                                                                            | 6.03                                       | 0.4095                                    | 4.0900                                           |
| 51.00       | 0.964073                        | 1590.02                     | 432.78                                        | 4376.76                                          | 29.56                                                                            | 6.10                                       | 0.4103                                    | 4.0969                                           |
| 52.00       | 0.963482                        | 1588.96                     | 247.44                                        | 4409.91                                          | 31.40                                                                            | 6.18                                       | 0.4111                                    | 4.1041                                           |
| 53.00       | 0.962887                        | 1587.87                     | 61.90                                         | 4432.96                                          | 33.17                                                                            | 6.20                                       | 0.4119                                    | 4.1114                                           |
| 54.00       | 0.962286                        | 1586.73                     | -148.65                                       | 4464.20                                          | 35.22                                                                            | 6.30                                       | 0.4128                                    | 4.1189                                           |
| 55.00       | 0.961677                        | 1585.63                     | -297.47                                       | 4497.56                                          | 36.79                                                                            | 6.35                                       | 0.4136                                    | 4.1266                                           |
| 56.00       | 0.961064                        | 1584.46                     | -458.91                                       | 4524.86                                          | 38.42                                                                            | 6.40                                       | 0.4145                                    | 4.1346                                           |
| 57.00       | 0.960445                        | 1583.27                     | -632.97                                       | 4550.19                                          | 40.15                                                                            | 6.46                                       | 0.4154                                    | 4.1427                                           |
| 58.00       | 0.959822                        | 1582.07                     | -782.43                                       | 4575.56                                          | 41.68                                                                            | 6.55                                       | 0.4163                                    | 4.1510                                           |
| 59.00       | 0.959190                        | 1580.83                     | -969.40                                       | 4607.14                                          | 43.58                                                                            | 6.61                                       | 0.4172                                    | 4.1594                                           |
| 60.00       | 0.958554                        | 1579.57                     | -1144.20                                      | 4632.65                                          | 45.33                                                                            | 6.67                                       | 0.4181                                    | 4.1680                                           |
| 61.00       | 0.957913                        | 1578.30                     | -1319.26                                      | 4658.22                                          | 47.10                                                                            | 6.70                                       | 0.4191                                    | 4.1767                                           |
| 62.00       | 0.957268                        | 1577.01                     | -1482.15                                      | 4685.88                                          | 48.80                                                                            | 6.80                                       | 0.4200                                    | 4.1856                                           |
| 63.00       | 0.956616                        | 1575.70                     | -1645.29                                      | 4711.57                                          | 50.49                                                                            | 6.81                                       | 0.4210                                    | 4.1947                                           |
| 64.00       | 0.955959                        | 1574.19                     | -1908.61                                      | 4737.32                                          | 53.03                                                                            | 6.91                                       | 0.4221                                    | 4.2044                                           |
| 65.00       | 0.955296                        | 1572.82                     | -2072.42                                      | 4767.23                                          | 54.78                                                                            | 6.95                                       | 0.4232                                    | 4.2139                                           |

**Table S.6.**

Measured and calculated values for  $\rho$ ,  $u$ ,  $[U]$ ,  $\phi V$ ,  $\phi K_S$ ,  $\alpha$ ,  $K_S$  and  $\beta_{S0}$  in the 25 to 65 °C temperature range. [poly(dA-dT)]<sub>2</sub> at 25% (v/v) EtOH.  $C_p = 5.11 \times 10^{-4} \text{ M}_{BP}$ ,  $I = 0.1 \text{ M (NaCl)}$ ,  $pH = 7.0$ .

| $T$<br>(°C) | $\rho$<br>(g cm <sup>-3</sup> ) | $u$<br>(m s <sup>-1</sup> ) | $[U]$<br>(cm <sup>3</sup> mol <sup>-1</sup> ) | $\phi V$<br>(cm <sup>3</sup> mol <sup>-1</sup> ) | $10^2 \times \phi K_S$<br>(cm <sup>3</sup> mol <sup>-1</sup> bar <sup>-1</sup> ) | $10^4 \times \alpha$<br>(K <sup>-1</sup> ) | $10^5 \times K_S$<br>(bar <sup>-1</sup> ) | $10^5 \times \beta_{S0}$<br>(bar <sup>-1</sup> ) |
|-------------|---------------------------------|-----------------------------|-----------------------------------------------|--------------------------------------------------|----------------------------------------------------------------------------------|--------------------------------------------|-------------------------------------------|--------------------------------------------------|
| 25.00       | 0.970810                        | 1620.27                     | 2127.41                                       | 2372.35                                          | -0.70                                                                            | 5.01                                       | 3.9237                                    | 3.9288                                           |
| 26.00       | 0.970324                        | 1619.26                     | 1947.14                                       | 2407.74                                          | 0.99                                                                             | 5.00                                       | 3.9305                                    | 3.9348                                           |
| 27.00       | 0.969835                        | 1618.20                     | 1730.38                                       | 2435.12                                          | 2.92                                                                             | 5.09                                       | 3.9377                                    | 3.9411                                           |
| 28.00       | 0.969339                        | 1617.13                     | 1646.70                                       | 2464.56                                          | 3.81                                                                             | 5.15                                       | 3.9449                                    | 3.9479                                           |
| 29.00       | 0.968836                        | 1616.01                     | 1465.96                                       | 2494.04                                          | 5.48                                                                             | 5.21                                       | 3.9524                                    | 3.9546                                           |
| 30.00       | 0.968326                        | 1614.89                     | 1382.05                                       | 2519.55                                          | 6.36                                                                             | 5.31                                       | 3.9600                                    | 3.9618                                           |
| 31.00       | 0.967810                        | 1613.73                     | 1213.09                                       | 2547.11                                          | 7.93                                                                             | 5.37                                       | 3.9678                                    | 3.9689                                           |
| 32.00       | 0.967289                        | 1612.57                     | 1056.06                                       | 2566.64                                          | 9.34                                                                             | 5.43                                       | 3.9756                                    | 3.9761                                           |
| 33.00       | 0.966758                        | 1611.37                     | 911.01                                        | 2594.30                                          | 10.74                                                                            | 5.50                                       | 3.9837                                    | 3.9835                                           |
| 34.00       | 0.966224                        | 1610.16                     | 790.09                                        | 2613.91                                          | 11.88                                                                            | 5.60                                       | 3.9919                                    | 3.9912                                           |
| 35.00       | 0.965681                        | 1608.92                     | 608.17                                        | 2641.65                                          | 13.57                                                                            | 5.63                                       | 4.0003                                    | 3.9988                                           |
| 36.00       | 0.965134                        | 1608.67                     | 1691.91                                       | 2657.30                                          | 5.04                                                                             | 5.71                                       | 4.0039                                    | 4.0067                                           |
| 37.00       | 0.964578                        | 1606.39                     | 316.70                                        | 2685.14                                          | 16.31                                                                            | 5.80                                       | 4.0175                                    | 4.0147                                           |
| 38.00       | 0.964017                        | 1605.09                     | 195.04                                        | 2704.92                                          | 17.48                                                                            | 5.86                                       | 4.0264                                    | 4.0230                                           |
| 39.00       | 0.963449                        | 1603.76                     | 36.60                                         | 2730.82                                          | 19.01                                                                            | 5.92                                       | 4.0355                                    | 4.0314                                           |
| 40.00       | 0.962876                        | 1602.42                     | -97.67                                        | 2752.71                                          | 20.31                                                                            | 5.98                                       | 4.0446                                    | 4.0399                                           |
| 41.00       | 0.962300                        | 1601.04                     | -232.14                                       | 2766.53                                          | 21.55                                                                            | 6.04                                       | 4.0540                                    | 4.0487                                           |
| 42.00       | 0.961712                        | 1599.65                     | -354.61                                       | 2794.60                                          | 22.82                                                                            | 6.11                                       | 4.0635                                    | 4.0577                                           |
| 43.00       | 0.961121                        | 1598.23                     | -513.99                                       | 2810.53                                          | 24.29                                                                            | 6.17                                       | 4.0733                                    | 4.0667                                           |
| 44.00       | 0.960524                        | 1596.80                     | -636.89                                       | 2834.62                                          | 25.54                                                                            | 6.26                                       | 4.0831                                    | 4.0759                                           |
| 45.00       | 0.959922                        | 1595.34                     | -784.53                                       | 2854.69                                          | 26.97                                                                            | 6.30                                       | 4.0931                                    | 4.0853                                           |
| 46.00       | 0.959315                        | 1593.86                     | -932.42                                       | 2872.77                                          | 28.39                                                                            | 6.37                                       | 4.1033                                    | 4.0948                                           |
| 47.00       | 0.958699                        | 1592.37                     | -1166.47                                      | 2897.00                                          | 30.57                                                                            | 6.45                                       | 4.1137                                    | 4.1041                                           |
| 48.00       | 0.958079                        | 1590.84                     | -1278.14                                      | 2915.17                                          | 31.72                                                                            | 6.51                                       | 4.1243                                    | 4.1142                                           |
| 49.00       | 0.957455                        | 1589.28                     | -1463.78                                      | 2929.29                                          | 33.44                                                                            | 6.54                                       | 4.1351                                    | 4.1241                                           |
| 50.00       | 0.956824                        | 1587.70                     | -1649.78                                      | 2947.53                                          | 35.21                                                                            | 6.59                                       | 4.1460                                    | 4.1342                                           |
| 51.00       | 0.956189                        | 1586.10                     | -1823.82                                      | 2965.81                                          | 36.89                                                                            | 6.68                                       | 4.1571                                    | 4.1445                                           |
| 52.00       | 0.955547                        | 1584.48                     | -1985.88                                      | 2984.14                                          | 38.48                                                                            | 6.74                                       | 4.1684                                    | 4.1551                                           |
| 53.00       | 0.954903                        | 1582.84                     | -2135.94                                      | 2994.32                                          | 39.91                                                                            | 6.79                                       | 4.1799                                    | 4.1659                                           |
| 54.00       | 0.954251                        | 1581.18                     | -2323.35                                      | 3016.81                                          | 41.77                                                                            | 6.85                                       | 4.1916                                    | 4.1766                                           |
| 55.00       | 0.953597                        | 1579.51                     | -2474.07                                      | 3025.02                                          | 43.21                                                                            | 6.92                                       | 4.2033                                    | 4.1877                                           |
| 56.00       | 0.952933                        | 1577.83                     | -2476.71                                      | 3045.55                                          | 43.52                                                                            | 6.96                                       | 4.2152                                    | 4.1994                                           |
| 57.00       | 0.952266                        | 1576.13                     | -2603.18                                      | 3057.92                                          | 44.81                                                                            | 7.03                                       | 4.2272                                    | 4.2109                                           |
| 58.00       | 0.951595                        | 1574.42                     | -2742.31                                      | 3074.43                                          | 46.24                                                                            | 7.11                                       | 4.2394                                    | 4.2224                                           |
| 59.00       | 0.950916                        | 1572.69                     | -2869.37                                      | 3093.03                                          | 47.60                                                                            | 7.12                                       | 4.2518                                    | 4.2341                                           |
| 60.00       | 0.950233                        | 1570.76                     | -3208.13                                      | 3107.57                                          | 50.73                                                                            | 7.25                                       | 4.2653                                    | 4.2461                                           |
| 61.00       | 0.949546                        | 1568.94                     | -3385.83                                      | 3124.20                                          | 52.53                                                                            | 7.25                                       | 4.2783                                    | 4.2582                                           |
| 62.00       | 0.948853                        | 1567.13                     | -3439.49                                      | 3144.98                                          | 53.32                                                                            | 7.36                                       | 4.2913                                    | 4.2709                                           |
| 63.00       | 0.948155                        | 1565.30                     | -3455.96                                      | 3157.58                                          | 53.73                                                                            | 7.37                                       | 4.3045                                    | 4.2839                                           |
| 64.00       | 0.947450                        | 1563.45                     | -3372.76                                      | 3182.57                                          | 53.40                                                                            | 7.46                                       | 4.3179                                    | 4.2976                                           |
| 65.00       | 0.946743                        | 1561.62                     | -3351.73                                      | 3195.25                                          | 53.49                                                                            | 7.48                                       | 4.3313                                    | 4.3109                                           |

**Table S.7.**

Measured and calculated values for  $\rho$ ,  $u$ ,  $[U]$ ,  $\phi V$ ,  $\phi K_S$ ,  $\alpha$ ,  $K_S$  and  $\beta_{S0}$  in the 25 to 65 °C temperature range. [poly(dA-dT)]<sub>2</sub> at 30% (v/v) EtOH.  $C_P = 5.13 \times 10^{-4}$  M<sub>BP</sub>,  $I = 0.1$  M (NaCl),  $pH = 7.0$ .

| $T$<br>(°C) | $\rho$<br>(g cm <sup>-3</sup> ) | $u$<br>(m s <sup>-1</sup> ) | $[U]$<br>(cm <sup>3</sup> mol <sup>-1</sup> ) | $\phi V$<br>(cm <sup>3</sup> mol <sup>-1</sup> ) | $10^2 \times \phi K_S$<br>(cm <sup>3</sup> mol <sup>-1</sup> bar <sup>-1</sup> ) | $10^4 \times \alpha$<br>(K <sup>-1</sup> ) | $10^5 \times K_S$<br>(bar <sup>-1</sup> ) | $10^5 \times \beta_{S0}$<br>(bar <sup>-1</sup> ) |
|-------------|---------------------------------|-----------------------------|-----------------------------------------------|--------------------------------------------------|----------------------------------------------------------------------------------|--------------------------------------------|-------------------------------------------|--------------------------------------------------|
| 25.00       | 0.964519                        | 1622.18                     | -1080.18                                      | 2465.12                                          | 25.23                                                                            | 5.79                                       | 0.3940                                    | 3.9320                                           |
| 26.00       | 0.963959                        | 1620.46                     | -1021.28                                      | 2514.94                                          | 25.23                                                                            | 5.83                                       | 0.3951                                    | 3.9427                                           |
| 27.00       | 0.963393                        | 1618.72                     | -938.22                                       | 2544.66                                          | 24.88                                                                            | 5.92                                       | 0.3961                                    | 3.9538                                           |
| 28.00       | 0.962820                        | 1616.98                     | -1119.75                                      | 2576.45                                          | 26.63                                                                            | 6.00                                       | 0.3972                                    | 3.9639                                           |
| 29.00       | 0.962240                        | 1615.21                     | -1301.66                                      | 2608.30                                          | 28.40                                                                            | 6.03                                       | 0.3983                                    | 3.9742                                           |
| 30.00       | 0.961657                        | 1613.44                     | -1315.14                                      | 2634.13                                          | 28.79                                                                            | 6.11                                       | 0.3995                                    | 3.9852                                           |
| 31.00       | 0.961065                        | 1611.66                     | -1449.37                                      | 2674.17                                          | 30.25                                                                            | 6.17                                       | 0.4006                                    | 3.9958                                           |
| 32.00       | 0.960472                        | 1609.89                     | -1559.69                                      | 2698.08                                          | 31.41                                                                            | 6.22                                       | 0.4017                                    | 4.0066                                           |
| 33.00       | 0.959870                        | 1608.07                     | -1706.58                                      | 2728.11                                          | 32.92                                                                            | 6.28                                       | 0.4029                                    | 4.0175                                           |
| 34.00       | 0.959266                        | 1606.27                     | -1793.23                                      | 2752.11                                          | 33.90                                                                            | 6.35                                       | 0.4040                                    | 4.0287                                           |
| 35.00       | 0.958654                        | 1604.44                     | -1952.81                                      | 2784.27                                          | 35.54                                                                            | 6.40                                       | 0.4052                                    | 4.0397                                           |
| 36.00       | 0.958037                        | 1602.61                     | -2052.08                                      | 2810.40                                          | 36.65                                                                            | 6.47                                       | 0.4064                                    | 4.0511                                           |
| 37.00       | 0.957416                        | 1600.75                     | -2188.03                                      | 2832.52                                          | 38.04                                                                            | 6.51                                       | 0.4076                                    | 4.0625                                           |
| 38.00       | 0.956790                        | 1598.89                     | -2263.51                                      | 2856.71                                          | 38.96                                                                            | 6.55                                       | 0.4088                                    | 4.0743                                           |
| 39.00       | 0.956160                        | 1597.01                     | -2387.86                                      | 2878.91                                          | 40.27                                                                            | 6.63                                       | 0.4101                                    | 4.0860                                           |
| 40.00       | 0.955524                        | 1595.13                     | -2475.94                                      | 2899.12                                          | 41.27                                                                            | 6.68                                       | 0.4113                                    | 4.0979                                           |
| 41.00       | 0.954882                        | 1593.23                     | -2576.45                                      | 2927.52                                          | 42.45                                                                            | 6.74                                       | 0.4126                                    | 4.1100                                           |
| 42.00       | 0.954237                        | 1591.32                     | -2738.25                                      | 2947.82                                          | 44.07                                                                            | 6.80                                       | 0.4138                                    | 4.1219                                           |
| 43.00       | 0.953585                        | 1589.40                     | -2827.10                                      | 2972.24                                          | 45.14                                                                            | 6.82                                       | 0.4151                                    | 4.1343                                           |
| 44.00       | 0.952933                        | 1587.45                     | -2952.92                                      | 2984.47                                          | 46.42                                                                            | 6.90                                       | 0.4164                                    | 4.1467                                           |
| 45.00       | 0.952273                        | 1585.50                     | -3079.03                                      | 3004.90                                          | 47.77                                                                            | 6.94                                       | 0.4177                                    | 4.1592                                           |
| 46.00       | 0.951609                        | 1583.52                     | -3230.02                                      | 3025.36                                          | 49.35                                                                            | 7.00                                       | 0.4191                                    | 4.1719                                           |
| 47.00       | 0.950943                        | 1581.55                     | -3319.96                                      | 3035.65                                          | 50.34                                                                            | 7.02                                       | 0.4204                                    | 4.1848                                           |
| 48.00       | 0.950273                        | 1579.56                     | -3434.75                                      | 3045.97                                          | 51.54                                                                            | 7.08                                       | 0.4218                                    | 4.1978                                           |
| 49.00       | 0.949597                        | 1577.56                     | -3549.83                                      | 3058.36                                          | 52.77                                                                            | 7.13                                       | 0.4231                                    | 4.2109                                           |
| 50.00       | 0.948917                        | 1575.59                     | -3603.53                                      | 3068.74                                          | 53.48                                                                            | 7.18                                       | 0.4245                                    | 4.2242                                           |
| 51.00       | 0.948233                        | 1573.57                     | -3756.15                                      | 3079.14                                          | 55.03                                                                            | 7.26                                       | 0.4259                                    | 4.2374                                           |
| 52.00       | 0.947545                        | 1571.53                     | -3847.44                                      | 3083.43                                          | 56.02                                                                            | 7.28                                       | 0.4273                                    | 4.2511                                           |
| 53.00       | 0.946850                        | 1569.52                     | -3790.55                                      | 3095.94                                          | 55.82                                                                            | 7.36                                       | 0.4287                                    | 4.2654                                           |
| 54.00       | 0.946153                        | 1567.33                     | -4055.79                                      | 3098.22                                          | 58.29                                                                            | 7.41                                       | 0.4302                                    | 4.2793                                           |
| 55.00       | 0.945447                        | 1565.25                     | -4172.70                                      | 3119.02                                          | 59.66                                                                            | 7.48                                       | 0.4317                                    | 4.2933                                           |
| 56.00       | 0.944740                        | 1563.17                     | -4277.51                                      | 3125.47                                          | 60.82                                                                            | 7.53                                       | 0.4332                                    | 4.3075                                           |
| 57.00       | 0.944026                        | 1561.06                     | -4370.24                                      | 3136.06                                          | 61.91                                                                            | 7.58                                       | 0.4347                                    | 4.3220                                           |
| 58.00       | 0.943310                        | 1558.86                     | -4575.42                                      | 3146.67                                          | 63.99                                                                            | 7.63                                       | 0.4362                                    | 4.3365                                           |
| 59.00       | 0.942585                        | 1556.84                     | -4431.88                                      | 3163.52                                          | 63.11                                                                            | 7.69                                       | 0.4377                                    | 4.3517                                           |
| 60.00       | 0.941857                        | 1554.63                     | -4413.22                                      | 3174.21                                          | 63.27                                                                            | 7.74                                       | 0.4393                                    | 4.3675                                           |
| 61.00       | 0.941125                        | 1552.48                     | -4194.46                                      | 3186.99                                          | 61.70                                                                            | 7.79                                       | 0.4409                                    | 4.3840                                           |
| 62.00       | 0.940389                        | 1550.34                     | -3987.53                                      | 3201.88                                          | 60.24                                                                            | 7.91                                       | 0.4424                                    | 4.4005                                           |
| 63.00       | 0.939641                        | 1548.15                     | -4118.46                                      | 3229.23                                          | 61.84                                                                            | 7.99                                       | 0.4440                                    | 4.4158                                           |
| 64.00       | 0.938892                        | 1545.95                     | -4299.96                                      | 3250.42                                          | 63.85                                                                            | 7.91                                       | 0.4456                                    | 4.4310                                           |
| 65.00       | 0.938152                        | 1543.71                     | -4394.12                                      | 3242.62                                          | 64.84                                                                            | 7.89                                       | 0.4473                                    | 4.4470                                           |

**Table S.8.**

Measured and calculated values for  $\rho$ ,  $u$ ,  $[U]$ ,  $\phi V$ ,  $\phi K_S$ ,  $\alpha$ ,  $K_S$  and  $\beta_{S0}$  in the 25 to 65 °C temperature range. [poly(dA-dT)]<sub>2</sub> at 40% (v/v) EtOH.  $C_P = 5.17 \times 10^{-4} \text{ M}_{BP}$ ,  $I = 0.1 \text{ M (NaCl)}$ ,  $pH = 7.0$ .

| $T$<br>(°C) | $\rho$<br>(g cm <sup>-3</sup> ) | $u$<br>(m s <sup>-1</sup> ) | $[U]$<br>(cm <sup>3</sup> mol <sup>-1</sup> ) | $\phi V$<br>(cm <sup>3</sup> mol <sup>-1</sup> ) | $10^2 \times \phi K_S$<br>(cm <sup>3</sup> mol <sup>-1</sup> bar <sup>-1</sup> ) | $10^4 \times \alpha$<br>(K <sup>-1</sup> ) | $10^5 \times K_S$<br>(bar <sup>-1</sup> ) | $10^5 \times \beta_{S0}$<br>(bar <sup>-1</sup> ) |
|-------------|---------------------------------|-----------------------------|-----------------------------------------------|--------------------------------------------------|----------------------------------------------------------------------------------|--------------------------------------------|-------------------------------------------|--------------------------------------------------|
| 25.00       | 0.950066                        | 1592.61                     | -72.92                                        | 549.73                                           | 2.33                                                                             | 7.24                                       | 0.4150                                    | 4.1498                                           |
| 26.00       | 0.949380                        | 1590.12                     | -85.21                                        | 505.28                                           | 2.07                                                                             | 7.22                                       | 0.4166                                    | 4.1658                                           |
| 27.00       | 0.948692                        | 1587.69                     | -158.48                                       | 507.69                                           | 2.71                                                                             | 7.27                                       | 0.4182                                    | 4.1813                                           |
| 28.00       | 0.948002                        | 1585.27                     | -219.76                                       | 501.94                                           | 3.18                                                                             | 7.31                                       | 0.4197                                    | 4.1969                                           |
| 29.00       | 0.947306                        | 1582.83                     | -330.13                                       | 506.39                                           | 4.16                                                                             | 7.35                                       | 0.4213                                    | 4.2124                                           |
| 30.00       | 0.946607                        | 1580.38                     | -416.34                                       | 506.76                                           | 4.90                                                                             | 7.42                                       | 0.4230                                    | 4.2283                                           |
| 31.00       | 0.945904                        | 1577.96                     | -453.77                                       | 505.10                                           | 5.22                                                                             | 7.47                                       | 0.4246                                    | 4.2442                                           |
| 32.00       | 0.945199                        | 1575.54                     | -491.30                                       | 505.47                                           | 5.56                                                                             | 7.45                                       | 0.4262                                    | 4.2603                                           |
| 33.00       | 0.944487                        | 1573.11                     | -516.66                                       | 507.90                                           | 5.82                                                                             | 7.56                                       | 0.4278                                    | 4.2766                                           |
| 34.00       | 0.943774                        | 1570.68                     | -554.41                                       | 508.29                                           | 6.17                                                                             | 7.59                                       | 0.4295                                    | 4.2929                                           |
| 35.00       | 0.943058                        | 1568.26                     | -567.60                                       | 506.62                                           | 6.29                                                                             | 7.63                                       | 0.4311                                    | 4.3093                                           |
| 36.00       | 0.942335                        | 1565.81                     | -617.90                                       | 513.17                                           | 6.80                                                                             | 7.66                                       | 0.4328                                    | 4.3259                                           |
| 37.00       | 0.941609                        | 1563.35                     | -668.37                                       | 519.73                                           | 7.32                                                                             | 7.73                                       | 0.4345                                    | 4.3427                                           |
| 38.00       | 0.940884                        | 1560.91                     | -669.41                                       | 511.90                                           | 7.29                                                                             | 7.71                                       | 0.4362                                    | 4.3596                                           |
| 39.00       | 0.940152                        | 1558.35                     | -819.45                                       | 516.42                                           | 8.67                                                                             | 7.82                                       | 0.4380                                    | 4.3767                                           |
| 40.00       | 0.939417                        | 1555.88                     | -845.61                                       | 514.76                                           | 8.91                                                                             | 7.85                                       | 0.4397                                    | 4.3939                                           |
| 41.00       | 0.938680                        | 1553.42                     | -859.40                                       | 517.23                                           | 9.09                                                                             | 7.87                                       | 0.4415                                    | 4.4112                                           |
| 42.00       | 0.937935                        | 1550.93                     | -885.72                                       | 521.77                                           | 9.40                                                                             | 7.96                                       | 0.4432                                    | 4.4288                                           |
| 43.00       | 0.937188                        | 1548.45                     | -899.63                                       | 528.38                                           | 9.61                                                                             | 7.97                                       | 0.4450                                    | 4.4464                                           |
| 44.00       | 0.936440                        | 1545.96                     | -926.09                                       | 526.73                                           | 9.87                                                                             | 8.03                                       | 0.4468                                    | 4.4642                                           |
| 45.00       | 0.935686                        | 1543.47                     | -940.11                                       | 529.23                                           | 10.06                                                                            | 8.05                                       | 0.4486                                    | 4.4822                                           |
| 46.00       | 0.934932                        | 1540.98                     | -929.08                                       | 525.51                                           | 9.96                                                                             | 8.14                                       | 0.4504                                    | 4.5004                                           |
| 47.00       | 0.934172                        | 1538.45                     | -955.75                                       | 528.01                                           | 10.26                                                                            | 8.15                                       | 0.4523                                    | 4.5187                                           |
| 48.00       | 0.933408                        | 1535.93                     | -982.50                                       | 532.59                                           | 10.59                                                                            | 8.19                                       | 0.4541                                    | 4.5371                                           |
| 49.00       | 0.932639                        | 1533.42                     | -996.71                                       | 539.26                                           | 10.82                                                                            | 8.23                                       | 0.4560                                    | 4.5557                                           |
| 50.00       | 0.931868                        | 1530.91                     | -985.72                                       | 541.78                                           | 10.78                                                                            | 8.32                                       | 0.4579                                    | 4.5744                                           |
| 51.00       | 0.931097                        | 1528.39                     | -987.34                                       | 538.07                                           | 10.81                                                                            | 8.32                                       | 0.4598                                    | 4.5933                                           |
| 52.00       | 0.930319                        | 1525.84                     | -976.32                                       | 536.44                                           | 10.73                                                                            | 8.35                                       | 0.4617                                    | 4.6126                                           |
| 53.00       | 0.929539                        | 1523.31                     | -939.85                                       | 543.14                                           | 10.50                                                                            | 8.40                                       | 0.4636                                    | 4.6320                                           |
| 54.00       | 0.928757                        | 1520.62                     | -1119.54                                      | 537.34                                           | 12.16                                                                            | 8.46                                       | 0.4656                                    | 4.6515                                           |
| 55.00       | 0.927970                        | 1518.06                     | 178.53                                        | 541.97                                           | 0.12                                                                             | 8.49                                       | 0.4676                                    | 4.6774                                           |
| 56.00       | 0.927179                        | 1515.47                     | -1136.10                                      | 544.52                                           | 12.48                                                                            | 8.53                                       | 0.4696                                    | 4.6910                                           |
| 57.00       | 0.926386                        | 1512.89                     | -1150.81                                      | 540.81                                           | 12.63                                                                            | 8.59                                       | 0.4716                                    | 4.7110                                           |
| 58.00       | 0.925592                        | 1510.32                     | -1267.97                                      | 537.09                                           | 13.76                                                                            | 8.61                                       | 0.4736                                    | 4.7305                                           |
| 59.00       | 0.924789                        | 1507.73                     | -1347.07                                      | 543.83                                           | 14.63                                                                            | 8.69                                       | 0.4757                                    | 4.7505                                           |
| 60.00       | 0.923985                        | 1505.09                     | -1490.70                                      | 546.40                                           | 16.08                                                                            | 8.70                                       | 0.4778                                    | 4.7706                                           |
| 61.00       | 0.923178                        | 1502.46                     | -1621.93                                      | 551.07                                           | 17.45                                                                            | 8.74                                       | 0.4799                                    | 4.7909                                           |
| 62.00       | 0.922369                        | 1499.84                     | -1740.71                                      | 549.46                                           | 18.65                                                                            | 8.79                                       | 0.4820                                    | 4.8113                                           |
| 63.00       | 0.921555                        | 1497.21                     | -1847.00                                      | 549.94                                           | 19.76                                                                            | 8.83                                       | 0.4841                                    | 4.8319                                           |
| 64.00       | 0.920740                        | 1494.55                     | -1876.14                                      | 546.23                                           | 20.09                                                                            | 8.91                                       | 0.4862                                    | 4.8533                                           |
| 65.00       | 0.919920                        | 1491.61                     | -2294.20                                      | 548.82                                           | 24.27                                                                            | 8.91                                       | 0.4886                                    | 4.8747                                           |

**Table S.9.**

Measured and calculated values for  $\rho$ ,  $u$ ,  $[U]$ ,  $\phi V$ ,  $\phi K_S$ ,  $\alpha$ ,  $K_S$  and  $\beta_{S0}$  in the 25 to 65 °C temperature range. ct-DNA at 0% (v/v) EtOH.  $C_P = 5.00 \times 10^{-4} \text{ M}_{\text{BP}}$ ,  $I = 0.1 \text{ M}$  (NaCl),  $pH = 7.0$ .

| $T$<br>(°C) | $\rho$<br>(g cm <sup>-3</sup> ) | $u$<br>(m s <sup>-1</sup> ) | $[U]$<br>(cm <sup>3</sup> mol <sup>-1</sup> ) | $\phi V$<br>(cm <sup>3</sup> mol <sup>-1</sup> ) | $10^2 \times \phi K_S$<br>(cm <sup>3</sup> mol <sup>-1</sup> bar <sup>-1</sup> ) | $10^4 \times \alpha$<br>(K <sup>-1</sup> ) | $10^5 \times K_S$<br>(bar <sup>-1</sup> ) | $10^5 \times \beta_{S0}$<br>(bar <sup>-1</sup> ) |
|-------------|---------------------------------|-----------------------------|-----------------------------------------------|--------------------------------------------------|----------------------------------------------------------------------------------|--------------------------------------------|-------------------------------------------|--------------------------------------------------|
| 25.00       | 1.001618                        | 1504.25                     | 598.48                                        | 59.26                                            | -7.76                                                                            | 2.86                                       | 0.4412                                    | 4.4162                                           |
| 26.00       | 1.001407                        | 1506.86                     | 570.89                                        | -62.60                                           | -8.56                                                                            | 2.88                                       | 0.4398                                    | 4.4020                                           |
| 27.00       | 1.001307                        | 1509.36                     | 583.20                                        | -448.33                                          | -12.03                                                                           | 2.94                                       | 0.4384                                    | 4.3888                                           |
| 28.00       | 1.000884                        | 1511.80                     | 555.78                                        | -216.57                                          | -9.73                                                                            | 3.00                                       | 0.4371                                    | 4.3759                                           |
| 29.00       | 1.000718                        | 1514.17                     | 554.91                                        | -486.59                                          | -12.05                                                                           | 3.05                                       | 0.4359                                    | 4.3635                                           |
| 30.00       | 1.000056                        | 1516.49                     | 567.26                                        | 245.38                                           | -5.76                                                                            | 3.11                                       | 0.4348                                    | 4.3515                                           |
| 31.00       | 1.000047                        | 1518.72                     | 566.43                                        | -356.83                                          | -10.96                                                                           | 3.17                                       | 0.4335                                    | 4.3401                                           |
| 32.00       | 0.999384                        | 1520.87                     | 552.47                                        | 333.60                                           | -4.84                                                                            | 3.23                                       | 0.4326                                    | 4.3291                                           |
| 33.00       | 0.998596                        | 1522.97                     | 577.99                                        | 1266.75                                          | 3.01                                                                             | 3.30                                       | 0.4317                                    | 4.3187                                           |
| 34.00       | 0.999041                        | 1524.98                     | 564.10                                        | -293.08                                          | -10.32                                                                           | 3.36                                       | 0.4304                                    | 4.3087                                           |
| 35.00       | 0.998474                        | 1526.95                     | 563.37                                        | 161.63                                           | -6.38                                                                            | 3.42                                       | 0.4295                                    | 4.2990                                           |
| 36.00       | 0.998322                        | 1528.84                     | 562.68                                        | -203.09                                          | -9.49                                                                            | 3.49                                       | 0.4286                                    | 4.2898                                           |
| 37.00       | 0.998016                        | 1530.67                     | 548.93                                        | -273.33                                          | -9.96                                                                            | 3.55                                       | 0.4277                                    | 4.2810                                           |
| 38.00       | 0.997211                        | 1532.45                     | 535.23                                        | 661.19                                           | -1.83                                                                            | 3.62                                       | 0.4270                                    | 4.2725                                           |
| 39.00       | 0.997195                        | 1534.16                     | 547.68                                        | -12.70                                           | -7.69                                                                            | 3.69                                       | 0.4261                                    | 4.2645                                           |
| 40.00       | 0.996914                        | 1535.82                     | 560.12                                        | -179.29                                          | -9.20                                                                            | 3.76                                       | 0.4253                                    | 4.2569                                           |
| 41.00       | 0.996427                        | 1537.41                     | 546.52                                        | 59.57                                            | -7.04                                                                            | 3.83                                       | 0.4246                                    | 4.2496                                           |
| 42.00       | 0.996138                        | 1538.95                     | 545.98                                        | -121.18                                          | -8.56                                                                            | 3.89                                       | 0.4239                                    | 4.2427                                           |
| 43.00       | 0.995566                        | 1540.43                     | 545.45                                        | 252.51                                           | -5.37                                                                            | 3.97                                       | 0.4233                                    | 4.2362                                           |
| 44.00       | 0.995327                        | 1541.86                     | 557.92                                        | -71.02                                           | -8.21                                                                            | 4.04                                       | 0.4226                                    | 4.2301                                           |
| 45.00       | 0.994906                        | 1543.22                     | 544.46                                        | -40.88                                           | -7.83                                                                            | 4.11                                       | 0.4220                                    | 4.2243                                           |
| 46.00       | 0.994483                        | 1544.51                     | 531.05                                        | -24.81                                           | -7.57                                                                            | 4.18                                       | 0.4215                                    | 4.2190                                           |
| 47.00       | 0.994053                        | 1545.76                     | 530.62                                        | -14.75                                           | -7.48                                                                            | 4.25                                       | 0.4210                                    | 4.2139                                           |
| 48.00       | 0.993612                        | 1546.96                     | 543.15                                        | -2.68                                            | -7.47                                                                            | 4.33                                       | 0.4206                                    | 4.2093                                           |
| 49.00       | 0.993166                        | 1548.10                     | 542.75                                        | 3.36                                             | -7.41                                                                            | 4.40                                       | 0.4201                                    | 4.2050                                           |
| 50.00       | 0.992712                        | 1549.18                     | 516.54                                        | 7.40                                             | -7.15                                                                            | 4.47                                       | 0.4197                                    | 4.2009                                           |
| 51.00       | 0.992254                        | 1550.22                     | 529.10                                        | 7.40                                             | -7.25                                                                            | 4.55                                       | 0.4194                                    | 4.1973                                           |
| 52.00       | 0.991790                        | 1551.20                     | 515.86                                        | 1.35                                             | -7.19                                                                            | 4.62                                       | 0.4190                                    | 4.1939                                           |
| 53.00       | 0.991319                        | 1552.14                     | 541.33                                        | 3.37                                             | -7.38                                                                            | 4.70                                       | 0.4187                                    | 4.1909                                           |
| 54.00       | 0.990839                        | 1553.01                     | 528.15                                        | 3.37                                             | -7.27                                                                            | 4.77                                       | 0.4185                                    | 4.1882                                           |
| 55.00       | 0.990355                        | 1553.85                     | 540.74                                        | 5.39                                             | -7.35                                                                            | 4.85                                       | 0.4182                                    | 4.1858                                           |
| 56.00       | 0.989861                        | 1554.63                     | 540.47                                        | 13.48                                            | -7.28                                                                            | 4.93                                       | 0.4180                                    | 4.1836                                           |
| 57.00       | 0.989365                        | 1555.37                     | 565.94                                        | 13.49                                            | -7.49                                                                            | 5.00                                       | 0.4178                                    | 4.1818                                           |
| 58.00       | 0.988869                        | 1556.05                     | 552.83                                        | 1.36                                             | -7.48                                                                            | 5.08                                       | 0.4177                                    | 4.1803                                           |
| 59.00       | 0.988362                        | 1556.67                     | 539.76                                        | -4.72                                            | -7.42                                                                            | 5.16                                       | 0.4175                                    | 4.1790                                           |
| 60.00       | 0.987850                        | 1557.26                     | 526.70                                        | -6.74                                            | -7.33                                                                            | 5.23                                       | 0.4174                                    | 4.1780                                           |
| 61.00       | 0.987331                        | 1557.82                     | 539.36                                        | -4.72                                            | -7.42                                                                            | 5.31                                       | 0.4174                                    | 4.1772                                           |
| 62.00       | 0.986805                        | 1558.32                     | 539.19                                        | -6.75                                            | -7.44                                                                            | 5.39                                       | 0.4173                                    | 4.1768                                           |
| 63.00       | 0.986275                        | 1558.79                     | 539.02                                        | -10.81                                           | -7.47                                                                            | 5.47                                       | 0.4173                                    | 4.1765                                           |
| 64.00       | 0.985738                        | 1559.20                     | 526.05                                        | -25.03                                           | -7.48                                                                            | 5.55                                       | 0.4173                                    | 4.1766                                           |
| 65.00       | 0.985195                        | 1559.58                     | 564.41                                        | -90.03                                           | -8.35                                                                            | 5.62                                       | 0.4173                                    | 4.1771                                           |

**Table S.10.**

Measured and calculated values for  $\rho$ ,  $u$ ,  $[U]$ ,  $\phi V$ ,  $\phi K_S$ ,  $\alpha$ ,  $K_S$  and  $\beta_{S0}$  in the 25 to 65 °C temperature range. ct-DNA at 10% (v/v) EtOH.  $C_p = 5.04 \times 10^{-4} M_{BP}$ ,  $I = 0.1 M$  (NaCl),  $pH = 7.0$ .

| $T$<br>(°C) | $\rho$<br>(g cm <sup>-3</sup> ) | $u$<br>(m s <sup>-1</sup> ) | $[U]$<br>(cm <sup>3</sup> mol <sup>-1</sup> ) | $\phi V$<br>(cm <sup>3</sup> mol <sup>-1</sup> ) | $10^2 \times \phi K_S$<br>(cm <sup>3</sup> mol <sup>-1</sup> bar <sup>-1</sup> ) | $10^4 \times \alpha$<br>(K <sup>-1</sup> ) | $10^5 \times K_S$<br>(bar <sup>-1</sup> ) | $10^5 \times \beta_{S0}$<br>(bar <sup>-1</sup> ) |
|-------------|---------------------------------|-----------------------------|-----------------------------------------------|--------------------------------------------------|----------------------------------------------------------------------------------|--------------------------------------------|-------------------------------------------|--------------------------------------------------|
| 25.00       | 0.988817                        | 1557.53                     | 905.10                                        | 88.95                                            | -9.68                                                                            | 2.93                                       | 0.4169                                    | 4.1739                                           |
| 26.00       | 0.987770                        | 1559.05                     | 1222.80                                       | 1579.12                                          | 0.11                                                                             | 2.99                                       | 0.4165                                    | 4.1683                                           |
| 27.00       | 0.988619                        | 1560.46                     | 1642.00                                       | -752.73                                          | -22.81                                                                           | 3.08                                       | 0.4154                                    | 4.1639                                           |
| 28.00       | 0.987831                        | 1561.83                     | 2175.27                                       | 187.50                                           | -19.40                                                                           | 3.19                                       | 0.4150                                    | 4.1602                                           |
| 29.00       | 0.987990                        | 1562.94                     | 2517.38                                       | -795.44                                          | -30.40                                                                           | 3.28                                       | 0.4143                                    | 4.1571                                           |
| 30.00       | 0.987403                        | 1564.08                     | 3011.78                                       | -297.01                                          | -30.35                                                                           | 3.38                                       | 0.4140                                    | 4.1545                                           |
| 31.00       | 0.987279                        | 1565.22                     | 3403.92                                       | -747.72                                          | -37.33                                                                           | 3.48                                       | 0.4134                                    | 4.1516                                           |
| 32.00       | 0.986963                        | 1566.29                     | 3719.50                                       | -824.46                                          | -40.56                                                                           | 3.57                                       | 0.4130                                    | 4.1487                                           |
| 33.00       | 0.986537                        | 1567.23                     | 3882.51                                       | -699.95                                          | -40.85                                                                           | 3.66                                       | 0.4127                                    | 4.1459                                           |
| 34.00       | 0.986226                        | 1568.05                     | 3855.07                                       | -825.07                                          | -41.64                                                                           | 3.76                                       | 0.4124                                    | 4.1431                                           |
| 35.00       | 0.985846                        | 1568.95                     | 3878.25                                       | -827.41                                          | -41.82                                                                           | 3.85                                       | 0.4121                                    | 4.1400                                           |
| 36.00       | 0.985458                        | 1569.79                     | 3850.79                                       | -827.73                                          | -41.57                                                                           | 3.94                                       | 0.4118                                    | 4.1371                                           |
| 37.00       | 0.985059                        | 1570.59                     | 3823.45                                       | -826.05                                          | -41.30                                                                           | 4.02                                       | 0.4115                                    | 4.1344                                           |
| 38.00       | 0.984655                        | 1571.19                     | 3606.45                                       | -826.39                                          | -39.49                                                                           | 4.11                                       | 0.4114                                    | 4.1321                                           |
| 39.00       | 0.984244                        | 1571.90                     | 3579.48                                       | -830.77                                          | -39.28                                                                           | 4.19                                       | 0.4112                                    | 4.1300                                           |
| 40.00       | 0.983822                        | 1572.55                     | 3514.67                                       | -821.03                                          | -38.65                                                                           | 4.28                                       | 0.4110                                    | 4.1280                                           |
| 41.00       | 0.983395                        | 1573.15                     | 3462.69                                       | -825.43                                          | -38.24                                                                           | 4.36                                       | 0.4109                                    | 4.1265                                           |
| 42.00       | 0.982963                        | 1573.70                     | 3398.20                                       | -833.88                                          | -37.77                                                                           | 4.44                                       | 0.4108                                    | 4.1251                                           |
| 43.00       | 0.982523                        | 1574.21                     | 3346.50                                       | -834.25                                          | -37.34                                                                           | 4.52                                       | 0.4107                                    | 4.1241                                           |
| 44.00       | 0.982074                        | 1574.66                     | 3269.67                                       | -834.63                                          | -36.70                                                                           | 4.60                                       | 0.4107                                    | 4.1233                                           |
| 45.00       | 0.981615                        | 1575.09                     | 3218.21                                       | -826.93                                          | -36.21                                                                           | 4.68                                       | 0.4106                                    | 4.1228                                           |
| 46.00       | 0.981155                        | 1575.45                     | 3141.65                                       | -833.39                                          | -35.63                                                                           | 4.76                                       | 0.4106                                    | 4.1225                                           |
| 47.00       | 0.980684                        | 1575.63                     | 2901.24                                       | -827.71                                          | -33.60                                                                           | 4.83                                       | 0.4107                                    | 4.1225                                           |
| 48.00       | 0.980203                        | 1575.89                     | 2812.35                                       | -817.98                                          | -32.79                                                                           | 4.91                                       | 0.4108                                    | 4.1228                                           |
| 49.00       | 0.979722                        | 1576.13                     | 2748.79                                       | -818.39                                          | -32.28                                                                           | 4.98                                       | 0.4109                                    | 4.1233                                           |
| 50.00       | 0.979231                        | 1576.34                     | 2710.55                                       | -806.62                                          | -31.87                                                                           | 5.05                                       | 0.4110                                    | 4.1241                                           |
| 51.00       | 0.978733                        | 1576.49                     | 2647.17                                       | -790.79                                          | -31.23                                                                           | 5.12                                       | 0.4111                                    | 4.1251                                           |
| 52.00       | 0.978229                        | 1576.49                     | 2445.24                                       | -779.01                                          | -29.48                                                                           | 5.19                                       | 0.4113                                    | 4.1264                                           |
| 53.00       | 0.977718                        | 1576.55                     | 2369.43                                       | -742.84                                          | -28.56                                                                           | 5.26                                       | 0.4115                                    | 4.1278                                           |
| 54.00       | 0.977201                        | 1576.55                     | 2268.49                                       | -706.64                                          | -27.44                                                                           | 5.33                                       | 0.4117                                    | 4.1295                                           |
| 55.00       | 0.976680                        | 1576.52                     | 2205.45                                       | -662.27                                          | -26.57                                                                           | 5.40                                       | 0.4120                                    | 4.1315                                           |
| 56.00       | 0.976149                        | 1576.45                     | 2142.46                                       | -587.33                                          | -25.45                                                                           | 5.46                                       | 0.4122                                    | 4.1337                                           |
| 57.00       | 0.975613                        | 1576.33                     | 2054.31                                       | -491.96                                          | -23.94                                                                           | 5.53                                       | 0.4125                                    | 4.1361                                           |
| 58.00       | 0.975069                        | 1576.17                     | 1991.43                                       | -412.79                                          | -22.79                                                                           | 5.59                                       | 0.4128                                    | 4.1388                                           |
| 59.00       | 0.974523                        | 1575.95                     | 1878.15                                       | -317.24                                          | -21.07                                                                           | 5.66                                       | 0.4132                                    | 4.1416                                           |
| 60.00       | 0.973968                        | 1575.71                     | 1802.73                                       | -199.16                                          | -19.49                                                                           | 5.72                                       | 0.4135                                    | 4.1446                                           |
| 61.00       | 0.973407                        | 1575.44                     | 1739.94                                       | -72.81                                           | -17.93                                                                           | 5.78                                       | 0.4139                                    | 4.1479                                           |
| 62.00       | 0.972841                        | 1575.12                     | 1601.46                                       | 59.80                                            | -15.70                                                                           | 5.84                                       | 0.4143                                    | 4.1512                                           |
| 63.00       | 0.972271                        | 1574.77                     | 1526.08                                       | 204.79                                           | -13.88                                                                           | 5.90                                       | 0.4147                                    | 4.1548                                           |
| 64.00       | 0.971691                        | 1574.39                     | 1501.20                                       | 368.32                                           | -12.33                                                                           | 5.93                                       | 0.4152                                    | 4.1589                                           |
| 65.00       | 0.969806                        | 1573.97                     | 1312.20                                       | 3176.76                                          | 12.61                                                                            | 5.94                                       | 0.4162                                    | 4.1625                                           |

**Table S.11.**

Measured and calculated values for  $\rho$ ,  $u$ ,  $[U]$ ,  $\phi V$ ,  $\phi K_S$ ,  $\alpha$ ,  $K_S$  and  $\beta_{S0}$  in the 25 to 65 °C temperature range. ct-DNA at 20% (v/v) EtOH.  $C_p = 5.09 \times 10^{-4} \text{ M}_{BP}$ ,  $I = 0.1 \text{ M (NaCl)}$ ,  $pH = 7.0$ .

| $T$<br>(°C) | $\rho$<br>(g cm <sup>-3</sup> ) | $u$<br>(m s <sup>-1</sup> ) | $[U]$<br>(cm <sup>3</sup> mol <sup>-1</sup> ) | $\phi V$<br>(cm <sup>3</sup> mol <sup>-1</sup> ) | $10^2 \times \phi K_S$<br>(cm <sup>3</sup> mol <sup>-1</sup> bar <sup>-1</sup> ) | $10^4 \times \alpha$<br>(K <sup>-1</sup> ) | $10^5 \times K_S$<br>(bar <sup>-1</sup> ) | $10^5 \times \beta_{S0}$<br>(bar <sup>-1</sup> ) |
|-------------|---------------------------------|-----------------------------|-----------------------------------------------|--------------------------------------------------|----------------------------------------------------------------------------------|--------------------------------------------|-------------------------------------------|--------------------------------------------------|
| 25.00       | 0.977590                        | 1607.24                     | 7119.07                                       | 2698.84                                          | -37.99                                                                           | 4.12                                       | 0.3960                                    | 3.9845                                           |
| 26.00       | 0.977187                        | 1606.90                     | 6664.80                                       | 2691.93                                          | -34.44                                                                           | 4.19                                       | 0.3963                                    | 3.9861                                           |
| 27.00       | 0.976772                        | 1606.63                     | 6333.40                                       | 2719.17                                          | -31.60                                                                           | 4.29                                       | 0.3966                                    | 3.9877                                           |
| 28.00       | 0.976349                        | 1606.56                     | 6284.42                                       | 2748.46                                          | -30.99                                                                           | 4.88                                       | 0.3968                                    | 3.9895                                           |
| 29.00       | 0.975818                        | 1608.17                     | 8359.19                                       | 2974.99                                          | -45.76                                                                           | 4.44                                       | 0.3962                                    | 3.9916                                           |
| 30.00       | 0.975484                        | 1606.02                     | 5880.14                                       | 2791.10                                          | -27.45                                                                           | 4.02                                       | 0.3974                                    | 3.9940                                           |
| 31.00       | 0.975035                        | 1605.44                     | 5352.78                                       | 2816.52                                          | -23.05                                                                           | 4.64                                       | 0.3979                                    | 3.9965                                           |
| 32.00       | 0.974580                        | 1605.04                     | 5095.57                                       | 2866.11                                          | -20.62                                                                           | 4.68                                       | 0.3983                                    | 3.9993                                           |
| 33.00       | 0.974121                        | 1605.15                     | 5526.14                                       | 2895.64                                          | -23.84                                                                           | 4.78                                       | 0.3984                                    | 4.0023                                           |
| 34.00       | 0.973649                        | 1604.11                     | 4581.33                                       | 2927.25                                          | -16.04                                                                           | 4.86                                       | 0.3991                                    | 4.0055                                           |
| 35.00       | 0.973175                        | 1603.82                     | 4594.47                                       | 2954.86                                          | -15.94                                                                           | 4.87                                       | 0.3995                                    | 4.0089                                           |
| 36.00       | 0.972702                        | 1606.04                     | 7802.68                                       | 2966.37                                          | -41.61                                                                           | 5.01                                       | 0.3986                                    | 4.0128                                           |
| 37.00       | 0.972201                        | 1603.24                     | 4891.81                                       | 3014.28                                          | -17.89                                                                           | 5.15                                       | 0.4002                                    | 4.0169                                           |
| 38.00       | 0.971700                        | 1602.23                     | 4167.74                                       | 3048.11                                          | -11.81                                                                           | 5.17                                       | 0.4009                                    | 4.0210                                           |
| 39.00       | 0.971196                        | 1601.40                     | 3726.24                                       | 3079.96                                          | -8.02                                                                            | 5.23                                       | 0.4015                                    | 4.0254                                           |
| 40.00       | 0.970684                        | 1600.96                     | 3801.22                                       | 3109.85                                          | -8.39                                                                            | 5.32                                       | 0.4019                                    | 4.0300                                           |
| 41.00       | 0.970164                        | 1600.08                     | 3384.11                                       | 3139.80                                          | -4.79                                                                            | 5.38                                       | 0.4026                                    | 4.0348                                           |
| 42.00       | 0.969640                        | 1600.04                     | 4025.42                                       | 3165.76                                          | -9.77                                                                            | 5.45                                       | 0.4028                                    | 4.0398                                           |
| 43.00       | 0.969107                        | 1598.59                     | 2980.18                                       | 3197.83                                          | -1.07                                                                            | 5.53                                       | 0.4038                                    | 4.0450                                           |
| 44.00       | 0.968569                        | 1597.92                     | 2944.41                                       | 3223.89                                          | -0.57                                                                            | 5.58                                       | 0.4044                                    | 4.0504                                           |
| 45.00       | 0.968025                        | 1597.43                     | 3167.50                                       | 3247.97                                          | -2.19                                                                            | 5.65                                       | 0.4048                                    | 4.0561                                           |
| 46.00       | 0.967474                        | 1596.55                     | 2946.94                                       | 3278.18                                          | -0.16                                                                            | 5.74                                       | 0.4055                                    | 4.0619                                           |
| 47.00       | 0.966915                        | 1595.32                     | 2405.60                                       | 3304.39                                          | 4.46                                                                             | 5.80                                       | 0.4064                                    | 4.0682                                           |
| 48.00       | 0.966353                        | 1594.48                     | 2332.73                                       | 3326.59                                          | 5.24                                                                             | 5.86                                       | 0.4070                                    | 4.0745                                           |
| 49.00       | 0.965784                        | 1593.61                     | 2259.82                                       | 3354.93                                          | 6.07                                                                             | 5.94                                       | 0.4077                                    | 4.0810                                           |
| 50.00       | 0.965205                        | 1593.21                     | 2854.14                                       | 3383.33                                          | 1.45                                                                             | 6.00                                       | 0.4082                                    | 4.0879                                           |
| 51.00       | 0.964625                        | 1592.02                     | 2484.86                                       | 3407.71                                          | 4.68                                                                             | 6.07                                       | 0.4090                                    | 4.0949                                           |
| 52.00       | 0.964035                        | 1590.75                     | 2053.36                                       | 3438.24                                          | 8.48                                                                             | 6.14                                       | 0.4099                                    | 4.1021                                           |
| 53.00       | 0.963442                        | 1589.69                     | 1930.83                                       | 3460.70                                          | 9.68                                                                             | 6.19                                       | 0.4107                                    | 4.1095                                           |
| 54.00       | 0.962843                        | 1588.65                     | 1870.11                                       | 3489.30                                          | 10.43                                                                            | 6.26                                       | 0.4115                                    | 4.1172                                           |
| 55.00       | 0.962236                        | 1592.25                     | 7634.12                                       | 3517.97                                          | -36.87                                                                           | 6.33                                       | 0.4099                                    | 4.1252                                           |
| 56.00       | 0.961624                        | 1586.67                     | 1996.58                                       | 3546.69                                          | 9.90                                                                             | 6.40                                       | 0.4131                                    | 4.1331                                           |
| 57.00       | 0.961005                        | 1585.27                     | 1613.25                                       | 3575.48                                          | 13.33                                                                            | 6.47                                       | 0.4141                                    | 4.1414                                           |
| 58.00       | 0.960380                        | 1584.22                     | 1664.04                                       | 3604.32                                          | 13.17                                                                            | 6.52                                       | 0.4149                                    | 4.1497                                           |
| 59.00       | 0.959751                        | 1588.24                     | 8090.11                                       | 3631.18                                          | -40.02                                                                           | 6.62                                       | 0.4131                                    | 4.1584                                           |
| 60.00       | 0.959110                        | 1582.43                     | 2300.71                                       | 3670.37                                          | 8.47                                                                             | 6.76                                       | 0.4164                                    | 4.1672                                           |
| 61.00       | 0.958457                        | 1580.62                     | 1505.90                                       | 3723.96                                          | 15.57                                                                            | 6.83                                       | 0.4176                                    | 4.1761                                           |
| 62.00       | 0.957801                        | 1579.61                     | 1743.69                                       | 3771.50                                          | 14.01                                                                            | 6.90                                       | 0.4184                                    | 4.1852                                           |
| 63.00       | 0.957136                        | 1578.30                     | 1645.33                                       | 3825.28                                          | 15.32                                                                            | 7.01                                       | 0.4194                                    | 4.1945                                           |
| 64.00       | 0.956459                        | 1577.15                     | 1771.38                                       | 3891.46                                          | 14.84                                                                            | 7.19                                       | 0.4203                                    | 4.2040                                           |
| 65.00       | 0.955761                        | 1575.93                     | 1860.23                                       | 3990.61                                          | 14.96                                                                            | 13.81                                      | 0.4213                                    | 4.2138                                           |

**Table S.12.**

Measured and calculated values for  $\rho$ ,  $u$ ,  $[U]$ ,  $\phi V$ ,  $\phi K_S$ ,  $\alpha$ ,  $K_S$  and  $\beta_{S0}$  in the 25 to 65 °C temperature range. ct-DNA at 30% (v/v) EtOH.  $C_p = 5.13 \times 10^{-4} M_{BP}$ ,  $I = 0.1 M$  (NaCl),  $pH = 7.0$ .

| $T$<br>(°C) | $\rho$<br>(g cm <sup>-3</sup> ) | $u$<br>(m s <sup>-1</sup> ) | $[U]$<br>(cm <sup>3</sup> mol <sup>-1</sup> ) | $\phi V$<br>(cm <sup>3</sup> mol <sup>-1</sup> ) | $10^2 \times \phi K_S$<br>(cm <sup>3</sup> mol <sup>-1</sup> bar <sup>-1</sup> ) | $10^4 \times \alpha$<br>(K <sup>-1</sup> ) | $10^5 \times K_S$<br>(bar <sup>-1</sup> ) | $10^5 \times \beta_{S0}$<br>(bar <sup>-1</sup> ) |
|-------------|---------------------------------|-----------------------------|-----------------------------------------------|--------------------------------------------------|----------------------------------------------------------------------------------|--------------------------------------------|-------------------------------------------|--------------------------------------------------|
| 25.00       | 0.967074                        | 1624.41                     | 1199.96                                       | 2720.03                                          | 9.17                                                                             | 5.24                                       | 0.3919                                    | 3.9195                                           |
| 26.00       | 0.966566                        | 1622.70                     | 840.70                                        | 2699.35                                          | 11.84                                                                            | 5.15                                       | 0.3929                                    | 3.9285                                           |
| 27.00       | 0.966078                        | 1621.11                     | 601.01                                        | 2622.26                                          | 13.15                                                                            | 5.41                                       | 0.3939                                    | 3.9373                                           |
| 28.00       | 0.965521                        | 1619.50                     | 372.96                                        | 2672.07                                          | 15.37                                                                            | 6.28                                       | 0.3949                                    | 3.9464                                           |
| 29.00       | 0.964865                        | 1617.83                     | 72.25                                         | 2913.54                                          | 19.70                                                                            | 5.88                                       | 0.3960                                    | 3.9555                                           |
| 30.00       | 0.964387                        | 1616.23                     | -108.47                                       | 2782.01                                          | 20.13                                                                            | 5.45                                       | 0.3970                                    | 3.9649                                           |
| 31.00       | 0.963814                        | 1614.51                     | -361.90                                       | 2828.02                                          | 22.56                                                                            | 5.97                                       | 0.3980                                    | 3.9746                                           |
| 32.00       | 0.963236                        | 1612.83                     | -603.73                                       | 2872.07                                          | 24.89                                                                            | 6.08                                       | 0.3991                                    | 3.9842                                           |
| 33.00       | 0.962643                        | 1611.18                     | -785.57                                       | 2928.33                                          | 26.85                                                                            | 6.14                                       | 0.4002                                    | 3.9939                                           |
| 34.00       | 0.962053                        | 1609.44                     | -1064.54                                      | 2976.57                                          | 29.54                                                                            | 6.15                                       | 0.4013                                    | 4.0038                                           |
| 35.00       | 0.961459                        | 1607.76                     | -1247.19                                      | 3016.80                                          | 31.40                                                                            | 6.24                                       | 0.4024                                    | 4.0138                                           |
| 36.00       | 0.960852                        | 1606.07                     | -1454.41                                      | 3071.27                                          | 33.58                                                                            | 6.34                                       | 0.4035                                    | 4.0238                                           |
| 37.00       | 0.960242                        | 1604.34                     | -1649.94                                      | 3121.77                                          | 35.65                                                                            | 6.35                                       | 0.4046                                    | 4.0341                                           |
| 38.00       | 0.959633                        | 1602.57                     | -1845.90                                      | 3154.11                                          | 37.59                                                                            | 6.43                                       | 0.4058                                    | 4.0447                                           |
| 39.00       | 0.959008                        | 1600.87                     | -1932.87                                      | 3208.83                                          | 38.84                                                                            | 6.50                                       | 0.4069                                    | 4.0555                                           |
| 40.00       | 0.958386                        | 1599.01                     | -2226.88                                      | 3251.44                                          | 41.67                                                                            | 6.55                                       | 0.4081                                    | 4.0663                                           |
| 41.00       | 0.957752                        | 1597.27                     | -2338.81                                      | 3300.23                                          | 43.10                                                                            | 6.63                                       | 0.4093                                    | 4.0773                                           |
| 42.00       | 0.957117                        | 1595.47                     | -2487.60                                      | 3345.03                                          | 44.79                                                                            | 6.65                                       | 0.4104                                    | 4.0885                                           |
| 43.00       | 0.956479                        | 1593.63                     | -2734.28                                      | 3377.71                                          | 47.20                                                                            | 6.73                                       | 0.4117                                    | 4.0995                                           |
| 44.00       | 0.955829                        | 1591.90                     | -2749.45                                      | 3432.83                                          | 47.91                                                                            | 6.82                                       | 0.4128                                    | 4.1111                                           |
| 45.00       | 0.955176                        | 1590.00                     | -2984.83                                      | 3477.86                                          | 50.36                                                                            | 6.85                                       | 0.4141                                    | 4.1226                                           |
| 46.00       | 0.954521                        | 1588.16                     | -3208.37                                      | 3518.90                                          | 52.68                                                                            | 6.88                                       | 0.4154                                    | 4.1340                                           |
| 47.00       | 0.953862                        | 1586.42                     | -3138.45                                      | 3557.97                                          | 52.58                                                                            | 6.94                                       | 0.4166                                    | 4.1461                                           |
| 48.00       | 0.953197                        | 1584.51                     | -3277.01                                      | 3595.07                                          | 54.19                                                                            | 6.99                                       | 0.4179                                    | 4.1584                                           |
| 49.00       | 0.952529                        | 1582.64                     | -3329.95                                      | 3628.16                                          | 55.07                                                                            | 7.07                                       | 0.4191                                    | 4.1708                                           |
| 50.00       | 0.951850                        | 1580.87                     | -3259.98                                      | 3675.62                                          | 55.05                                                                            | 7.13                                       | 0.4204                                    | 4.1833                                           |
| 51.00       | 0.951172                        | 1578.92                     | -3374.66                                      | 3710.89                                          | 56.47                                                                            | 7.17                                       | 0.4217                                    | 4.1961                                           |
| 52.00       | 0.950486                        | 1578.01                     | -2231.85                                      | 3752.37                                          | 47.37                                                                            | 7.24                                       | 0.4225                                    | 4.2088                                           |
| 53.00       | 0.949794                        | 1575.27                     | -3370.15                                      | 3793.93                                          | 57.47                                                                            | 7.27                                       | 0.4243                                    | 4.2215                                           |
| 54.00       | 0.949105                        | 1574.28                     | -2286.51                                      | 3819.18                                          | 48.68                                                                            | 7.32                                       | 0.4251                                    | 4.2346                                           |
| 55.00       | 0.948405                        | 1573.03                     | -1522.03                                      | 3864.97                                          | 42.73                                                                            | 7.42                                       | 0.4261                                    | 4.2477                                           |
| 56.00       | 0.947698                        | 1570.83                     | -1982.17                                      | 3904.72                                          | 47.11                                                                            | 7.43                                       | 0.4276                                    | 4.2606                                           |
| 57.00       | 0.946996                        | 1567.64                     | -3609.40                                      | 3930.15                                          | 61.39                                                                            | 7.47                                       | 0.4297                                    | 4.2740                                           |
| 58.00       | 0.946283                        | 1566.71                     | -2409.18                                      | 3967.98                                          | 51.61                                                                            | 7.57                                       | 0.4305                                    | 4.2875                                           |
| 59.00       | 0.945565                        | 1564.91                     | -2325.02                                      | 4007.93                                          | 51.39                                                                            | 7.58                                       | 0.4318                                    | 4.3009                                           |
| 60.00       | 0.944850                        | 1561.75                     | -3946.03                                      | 4035.61                                          | 65.77                                                                            | 7.61                                       | 0.4339                                    | 4.3143                                           |
| 61.00       | 0.944125                        | 1561.49                     | -2155.85                                      | 4069.53                                          | 50.77                                                                            | 7.70                                       | 0.4344                                    | 4.3270                                           |
| 62.00       | 0.943396                        | 1559.30                     | -3080.87                                      | 4107.64                                          | 59.25                                                                            | 7.78                                       | 0.4360                                    | 4.3383                                           |
| 63.00       | 0.942657                        | 1556.18                     | -4545.90                                      | 4156.14                                          | 72.62                                                                            | 7.90                                       | 0.4381                                    | 4.3524                                           |
| 64.00       | 0.941905                        | 1556.34                     | -2013.10                                      | 4208.90                                          | 51.19                                                                            | 8.08                                       | 0.4383                                    | 4.3662                                           |
| 65.00       | 0.941135                        | 1553.71                     | -2841.94                                      | 4280.37                                          | 59.25                                                                            | 9.02                                       | 0.4402                                    | 4.3807                                           |



**Table S.13.**

Measured and calculated values for  $\rho$ ,  $u$ ,  $[U]$ ,  $\phi V$ ,  $\phi K_S$ ,  $\alpha$ ,  $K_S$  and  $\beta_{S0}$  in the 25 to 65 °C temperature range. ct-DNA for 40% (v/v) EtOH.  $C_P = 5.17 \times 10^{-4} \text{ M}_{BP}$ ,  $I = 0.1 \text{ M (NaCl)}$ ,  $pH = 7.0$ .

| $T$<br>(°C) | $\rho$<br>(g cm <sup>-3</sup> ) | $u$<br>(m s <sup>-1</sup> ) | $[U]$<br>(cm <sup>3</sup> mol <sup>-1</sup> ) | $\phi V$<br>(cm <sup>3</sup> mol <sup>-1</sup> ) | $10^2 \times \phi K_S$<br>(cm <sup>3</sup> mol <sup>-1</sup> bar <sup>-1</sup> ) | $10^4 \times \alpha$<br>(K <sup>-1</sup> ) | $10^5 \times K_S$<br>(bar <sup>-1</sup> ) | $10^5 \times \beta_{S0}$<br>(bar <sup>-1</sup> ) |
|-------------|---------------------------------|-----------------------------|-----------------------------------------------|--------------------------------------------------|----------------------------------------------------------------------------------|--------------------------------------------|-------------------------------------------|--------------------------------------------------|
| 25.00       | 0.95044                         | 1592.74                     | -5187.54                                      | 3359.77                                          | 67.48                                                                            | 7.12                                       | 0.4147                                    | 4.1197                                           |
| 26.00       | 0.949761                        | 1590.35                     | -5340.58                                      | 3380.45                                          | 69.16                                                                            | 7.19                                       | 0.4163                                    | 4.1343                                           |
| 27.00       | 0.949073                        | 1587.97                     | -5433.41                                      | 3399.16                                          | 70.33                                                                            | 7.27                                       | 0.4178                                    | 4.1493                                           |
| 28.00       | 0.948382                        | 1585.59                     | -5465.82                                      | 3419.95                                          | 71.03                                                                            | 7.32                                       | 0.4194                                    | 4.1646                                           |
| 29.00       | 0.947685                        | 1583.21                     | -5510.49                                      | 3440.79                                          | 71.84                                                                            | 7.38                                       | 0.4210                                    | 4.1799                                           |
| 30.00       | 0.946983                        | 1580.84                     | -5530.90                                      | 3467.78                                          | 72.50                                                                            | 7.42                                       | 0.4226                                    | 4.1955                                           |
| 31.00       | 0.946279                        | 1578.45                     | -5563.64                                      | 3488.71                                          | 73.22                                                                            | 7.46                                       | 0.4241                                    | 4.2111                                           |
| 32.00       | 0.945572                        | 1576.06                     | -5608.68                                      | 3511.72                                          | 74.07                                                                            | 7.51                                       | 0.4258                                    | 4.2268                                           |
| 33.00       | 0.944858                        | 1573.64                     | -5641.74                                      | 3540.91                                          | 74.87                                                                            | 7.55                                       | 0.4274                                    | 4.2428                                           |
| 34.00       | 0.944145                        | 1571.28                     | -5613.45                                      | 3559.93                                          | 75.08                                                                            | 7.59                                       | 0.4290                                    | 4.2589                                           |
| 35.00       | 0.943425                        | 1568.86                     | -5634.35                                      | 3585.14                                          | 75.76                                                                            | 7.64                                       | 0.4306                                    | 4.2751                                           |
| 36.00       | 0.942704                        | 1566.47                     | -5630.63                                      | 3604.25                                          | 76.17                                                                            | 7.68                                       | 0.4323                                    | 4.2914                                           |
| 37.00       | 0.941977                        | 1564.06                     | -5676.20                                      | 3631.60                                          | 77.09                                                                            | 7.74                                       | 0.4340                                    | 4.3077                                           |
| 38.00       | 0.941244                        | 1561.66                     | -5672.57                                      | 3659.02                                          | 77.59                                                                            | 7.78                                       | 0.4356                                    | 4.3243                                           |
| 39.00       | 0.940512                        | 1559.22                     | -5706.10                                      | 3680.32                                          | 78.36                                                                            | 7.81                                       | 0.4373                                    | 4.3410                                           |
| 40.00       | 0.939775                        | 1556.77                     | -5764.50                                      | 3707.83                                          | 79.41                                                                            | 7.86                                       | 0.4391                                    | 4.3578                                           |
| 41.00       | 0.939034                        | 1554.36                     | -5699.13                                      | 3731.30                                          | 79.36                                                                            | 7.91                                       | 0.4408                                    | 4.3750                                           |
| 42.00       | 0.938288                        | 1551.90                     | -5745.34                                      | 3758.93                                          | 80.31                                                                            | 7.96                                       | 0.4425                                    | 4.3921                                           |
| 43.00       | 0.937540                        | 1549.43                     | -5766.89                                      | 3778.38                                          | 80.99                                                                            | 7.98                                       | 0.4443                                    | 4.4095                                           |
| 44.00       | 0.936791                        | 1546.96                     | -5776.07                                      | 3799.93                                          | 81.58                                                                            | 8.02                                       | 0.4461                                    | 4.4270                                           |
| 45.00       | 0.936037                        | 1544.46                     | -5822.76                                      | 3823.59                                          | 82.53                                                                            | 8.08                                       | 0.4479                                    | 4.4447                                           |
| 46.00       | 0.935279                        | 1541.97                     | -5857.09                                      | 3847.31                                          | 83.37                                                                            | 8.13                                       | 0.4497                                    | 4.4625                                           |
| 47.00       | 0.934516                        | 1539.47                     | -5879.07                                      | 3871.08                                          | 84.12                                                                            | 8.18                                       | 0.4515                                    | 4.4805                                           |
| 48.00       | 0.933751                        | 1537.00                     | -5850.94                                      | 3894.90                                          | 84.42                                                                            | 8.21                                       | 0.4533                                    | 4.4986                                           |
| 49.00       | 0.932983                        | 1534.46                     | -5935.82                                      | 3914.64                                          | 85.70                                                                            | 8.25                                       | 0.4552                                    | 4.5168                                           |
| 50.00       | 0.932211                        | 1531.96                     | -5958.04                                      | 3938.56                                          | 86.47                                                                            | 8.30                                       | 0.4571                                    | 4.5352                                           |
| 51.00       | 0.931437                        | 1529.46                     | -6005.48                                      | 3956.32                                          | 87.41                                                                            | 8.34                                       | 0.4590                                    | 4.5535                                           |
| 52.00       | 0.930658                        | 1526.89                     | -6166.73                                      | 3972.06                                          | 89.37                                                                            | 8.38                                       | 0.4609                                    | 4.5719                                           |
| 53.00       | 0.929876                        | 1524.33                     | -6303.22                                      | 3994.06                                          | 91.19                                                                            | 8.43                                       | 0.4628                                    | 4.5904                                           |
| 54.00       | 0.929091                        | 1521.78                     | -6351.65                                      | 4020.26                                          | 92.25                                                                            | 8.44                                       | 0.4648                                    | 4.6094                                           |
| 55.00       | 0.928306                        | 1519.26                     | -6362.15                                      | 4034.04                                          | 92.86                                                                            | 8.50                                       | 0.4667                                    | 4.6285                                           |
| 56.00       | 0.927513                        | 1516.77                     | -6334.53                                      | 4058.27                                          | 93.21                                                                            | 8.55                                       | 0.4686                                    | 4.6478                                           |
| 57.00       | 0.926721                        | 1514.31                     | -6230.49                                      | 4063.82                                          | 92.68                                                                            | 8.57                                       | 0.4706                                    | 4.6674                                           |
| 58.00       | 0.925925                        | 1511.89                     | -6087.77                                      | 4079.80                                          | 91.88                                                                            | 8.60                                       | 0.4725                                    | 4.6870                                           |
| 59.00       | 0.925128                        | 1510.10                     | -5139.18                                      | 4083.31                                          | 83.37                                                                            | 8.63                                       | 0.4740                                    | 4.7068                                           |
| 60.00       | 0.924328                        | 1507.95                     | -4635.63                                      | 4091.01                                          | 79.03                                                                            | 8.68                                       | 0.4758                                    | 4.7268                                           |
| 61.00       | 0.923524                        | 1505.47                     | -4579.27                                      | 4094.56                                          | 78.86                                                                            | 8.78                                       | 0.4778                                    | 4.7467                                           |
| 62.00       | 0.922706                        | 1503.30                     | -4278.25                                      | 4125.35                                          | 76.60                                                                            | 8.97                                       | 0.4796                                    | 4.7661                                           |
| 63.00       | 0.921868                        | 1500.61                     | -4889.29                                      | 4183.48                                          | 83.30                                                                            | 9.20                                       | 0.4817                                    | 4.7844                                           |
| 64.00       | 0.921010                        | 1498.46                     | -5166.15                                      | 4281.56                                          | 87.18                                                                            | 9.54                                       | 0.4836                                    | 4.8010                                           |
| 65.00       | 0.920110                        | 1496.14                     | -5611.57                                      | 4461.73                                          | 93.51                                                                            | 9.78                                       | 0.4855                                    | 4.8179                                           |

**Table S.14.**

Measured and calculated values for  $\rho$ ,  $u$ ,  $[U]$ ,  $\phi V$ ,  $\phi K_S$ ,  $\alpha$ ,  $K_S$  and  $\beta_{S0}$  in the 25 to 65 °C temperature range. ct-DNA for 50% (v/v) EtOH.  $C_p = 5.18 \times 10^{-4} \text{ M}_{BP}$ ,  $I = 0.1 \text{ M (NaCl)}$ ,  $pH = 7.0$ .

| $T$<br>(°C) | $\rho$<br>(g cm <sup>-3</sup> ) | $u$<br>(m s <sup>-1</sup> ) | $[U]$<br>(cm <sup>3</sup> mol <sup>-1</sup> ) | $\phi V$<br>(cm <sup>3</sup> mol <sup>-1</sup> ) | $10^2 \times \phi K_S$<br>(cm <sup>3</sup> mol <sup>-1</sup> bar <sup>-1</sup> ) | $10^4 \times \alpha$<br>(K <sup>-1</sup> ) | $10^5 \times K_S$<br>(bar <sup>-1</sup> ) | $10^5 \times \beta_{S0}$<br>(bar <sup>-1</sup> ) |
|-------------|---------------------------------|-----------------------------|-----------------------------------------------|--------------------------------------------------|----------------------------------------------------------------------------------|--------------------------------------------|-------------------------------------------|--------------------------------------------------|
| 25.00       | 0.933344                        | 1540.89                     | 3325.82                                       | -76.78                                           | -34.13                                                                           | 8.10                                       | 0.4512                                    | 4.5299                                           |
| 26.00       | 0.932587                        | 1538.28                     | 3356.66                                       | -89.27                                           | -34.67                                                                           | 8.13                                       | 0.4531                                    | 4.5492                                           |
| 27.00       | 0.931828                        | 1535.70                     | 3337.08                                       | -93.49                                           | -34.67                                                                           | 8.17                                       | 0.4550                                    | 4.5681                                           |
| 28.00       | 0.931065                        | 1533.12                     | 3330.07                                       | -99.79                                           | -34.82                                                                           | 8.22                                       | 0.4569                                    | 4.5872                                           |
| 29.00       | 0.930298                        | 1530.53                     | 3285.09                                       | -99.87                                           | -34.55                                                                           | 8.26                                       | 0.4589                                    | 4.6064                                           |
| 30.00       | 0.929528                        | 1527.95                     | 3252.61                                       | -102.03                                          | -34.42                                                                           | 8.29                                       | 0.4608                                    | 4.6256                                           |
| 31.00       | 0.928757                        | 1525.36                     | 3156.55                                       | -108.36                                          | -33.73                                                                           | 8.31                                       | 0.4628                                    | 4.6447                                           |
| 32.00       | 0.927986                        | 1522.79                     | 3009.27                                       | -114.69                                          | -32.55                                                                           | 8.36                                       | 0.4647                                    | 4.6636                                           |
| 33.00       | 0.927205                        | 1520.19                     | 2823.36                                       | -106.46                                          | -30.87                                                                           | 8.42                                       | 0.4667                                    | 4.6826                                           |
| 34.00       | 0.926424                        | 1517.59                     | 2738.90                                       | -112.80                                          | -30.27                                                                           | 8.44                                       | 0.4687                                    | 4.7022                                           |
| 35.00       | 0.925641                        | 1514.98                     | 2743.63                                       | -114.98                                          | -30.47                                                                           | 8.46                                       | 0.4707                                    | 4.7225                                           |
| 36.00       | 0.924857                        | 1512.38                     | 2735.55                                       | -121.35                                          | -30.58                                                                           | 8.50                                       | 0.4727                                    | 4.7427                                           |
| 37.00       | 0.924069                        | 1509.76                     | 2740.30                                       | -125.63                                          | -30.81                                                                           | 8.55                                       | 0.4748                                    | 4.7633                                           |
| 38.00       | 0.923277                        | 1507.13                     | 2745.09                                       | -123.65                                          | -30.97                                                                           | 8.58                                       | 0.4768                                    | 4.7840                                           |
| 39.00       | 0.922484                        | 1504.53                     | 2801.32                                       | -127.94                                          | -31.69                                                                           | 8.61                                       | 0.4789                                    | 4.8050                                           |
| 40.00       | 0.921688                        | 1501.87                     | 2780.50                                       | -134.34                                          | -31.69                                                                           | 8.67                                       | 0.4810                                    | 4.8261                                           |
| 41.00       | 0.920886                        | 1499.23                     | 2824.15                                       | -128.16                                          | -32.20                                                                           | 8.69                                       | 0.4831                                    | 4.8475                                           |
| 42.00       | 0.920087                        | 1496.59                     | 2867.95                                       | -130.37                                          | -32.80                                                                           | 8.73                                       | 0.4852                                    | 4.8691                                           |
| 43.00       | 0.919281                        | 1493.93                     | 2898.99                                       | -134.69                                          | -33.29                                                                           | 8.78                                       | 0.4874                                    | 4.8909                                           |
| 44.00       | 0.918473                        | 1491.27                     | 2891.18                                       | -134.81                                          | -33.37                                                                           | 8.80                                       | 0.4896                                    | 4.9127                                           |
| 45.00       | 0.917664                        | 1488.61                     | 2896.36                                       | -137.03                                          | -33.59                                                                           | 8.84                                       | 0.4918                                    | 4.9346                                           |
| 46.00       | 0.916850                        | 1485.94                     | 2927.63                                       | -137.15                                          | -34.06                                                                           | 8.88                                       | 0.4940                                    | 4.9569                                           |
| 47.00       | 0.916034                        | 1483.22                     | 2906.90                                       | -141.49                                          | -34.05                                                                           | 8.93                                       | 0.4962                                    | 4.9795                                           |
| 48.00       | 0.915214                        | 1480.50                     | 2873.01                                       | -137.40                                          | -33.83                                                                           | 8.95                                       | 0.4985                                    | 5.0021                                           |
| 49.00       | 0.914395                        | 1477.79                     | 2838.98                                       | -145.97                                          | -33.73                                                                           | 8.98                                       | 0.5008                                    | 5.0248                                           |
| 50.00       | 0.913572                        | 1475.06                     | 2752.36                                       | -158.79                                          | -33.14                                                                           | 9.04                                       | 0.5031                                    | 5.0475                                           |
| 51.00       | 0.912744                        | 1472.35                     | 2691.69                                       | -156.82                                          | -32.66                                                                           | 9.07                                       | 0.5054                                    | 5.0704                                           |
| 52.00       | 0.911916                        | 1469.64                     | 2683.49                                       | -169.67                                          | -32.86                                                                           | 9.08                                       | 0.5077                                    | 5.0937                                           |
| 53.00       | 0.911088                        | 1466.96                     | 2701.59                                       | -182.54                                          | -33.33                                                                           | 9.11                                       | 0.5100                                    | 5.1171                                           |
| 54.00       | 0.910256                        | 1464.23                     | 2666.97                                       | -191.20                                          | -33.22                                                                           | 9.18                                       | 0.5124                                    | 5.1408                                           |
| 55.00       | 0.909417                        | 1461.52                     | 2658.68                                       | -195.62                                          | -33.34                                                                           | 9.21                                       | 0.5148                                    | 5.1646                                           |
| 56.00       | 0.908581                        | 1458.89                     | 2862.54                                       | -214.94                                          | -35.82                                                                           | 9.22                                       | 0.5171                                    | 5.1891                                           |
| 57.00       | 0.907741                        | 1456.41                     | 3159.95                                       | -227.90                                          | -39.23                                                                           | 9.27                                       | 0.5194                                    | 5.2133                                           |
| 58.00       | 0.906898                        | 1454.19                     | 3817.65                                       | -236.64                                          | -46.40                                                                           | 9.31                                       | 0.5214                                    | 5.2377                                           |
| 59.00       | 0.906052                        | 1451.64                     | 4011.31                                       | -249.65                                          | -48.79                                                                           | 9.34                                       | 0.5238                                    | 5.2621                                           |
| 60.00       | 0.905207                        | 1449.35                     | 4526.06                                       | -279.76                                          | -54.78                                                                           | 9.41                                       | 0.5259                                    | 5.2865                                           |
| 61.00       | 0.904350                        | 1446.42                     | 4240.28                                       | -282.16                                          | -52.03                                                                           | 9.60                                       | 0.5285                                    | 5.3114                                           |
| 62.00       | 0.903470                        | 1444.06                     | 4556.11                                       | -241.81                                          | -55.21                                                                           | 9.83                                       | 0.5308                                    | 5.3356                                           |
| 63.00       | 0.902572                        | 1441.26                     | 4430.41                                       | -173.57                                          | -53.40                                                                           | 10.16                                      | 0.5334                                    | 5.3608                                           |
| 64.00       | 0.901636                        | 1438.77                     | 4680.76                                       | -19.51                                           | -54.69                                                                           | 10.28                                      | 0.5358                                    | 5.3860                                           |
| 65.00       | 0.900718                        | 1436.25                     | 4851.09                                       | 81.24                                            | -55.70                                                                           | 10.19                                      | 0.5382                                    | 5.4111                                           |

**Table S.15.**

Measured and calculated values for  $\rho$ ,  $u$ ,  $[U]$ ,  $\phi V$ ,  $\phi K_S$ ,  $\alpha$ ,  $K_S$  and  $\beta_{S0}$  in the 25 to 65 °C temperature range. poly(rA)-poly(rU) for 0% (v/v) EtOH.  $C_P = 5.00 \times 10^{-4} \text{ M}_{\text{BP}}$ ,  $I = 0.1 \text{ M (NaCl)}$ ,  $pH = 7.0$ .

| $T$<br>(°C) | $\rho$<br>(g cm <sup>-3</sup> ) | $u$<br>(m s <sup>-1</sup> ) | $[U]$<br>(cm <sup>3</sup> mol <sup>-1</sup> ) | $\phi V$<br>(cm <sup>3</sup> mol <sup>-1</sup> ) | $10^2 \times \phi K_S$<br>(cm <sup>3</sup> mol <sup>-1</sup> bar <sup>-1</sup> ) | $10^4 \times \alpha$<br>(K <sup>-1</sup> ) | $10^5 \times K_S$<br>(bar <sup>-1</sup> ) | $10^5 \times \beta_{S0}$<br>(bar <sup>-1</sup> ) |
|-------------|---------------------------------|-----------------------------|-----------------------------------------------|--------------------------------------------------|----------------------------------------------------------------------------------|--------------------------------------------|-------------------------------------------|--------------------------------------------------|
| 25.00       | 1.001710                        | 1503.67                     | -172.90                                       | -124.50                                          | -2.57                                                                            | 2.73                                       | 0.4415                                    | 4.4162                                           |
| 26.00       | 1.001437                        | 1506.29                     | -185.87                                       | -122.53                                          | -2.43                                                                            | 2.76                                       | 0.4401                                    | 4.4020                                           |
| 27.00       | 1.001158                        | 1508.80                     | -159.05                                       | -150.55                                          | -2.90                                                                            | 2.84                                       | 0.4388                                    | 4.3888                                           |
| 28.00       | 1.000868                        | 1511.25                     | -172.03                                       | -184.58                                          | -3.08                                                                            | 2.93                                       | 0.4375                                    | 4.3759                                           |
| 29.00       | 1.000570                        | 1513.62                     | -171.76                                       | -190.63                                          | -3.13                                                                            | 3.02                                       | 0.4362                                    | 4.3635                                           |
| 30.00       | 1.000263                        | 1515.92                     | -184.69                                       | -168.69                                          | -2.82                                                                            | 3.11                                       | 0.4350                                    | 4.3515                                           |
| 31.00       | 0.999948                        | 1518.16                     | -171.25                                       | -158.73                                          | -2.84                                                                            | 3.20                                       | 0.4339                                    | 4.3401                                           |
| 32.00       | 0.999624                        | 1520.32                     | -171.00                                       | -146.78                                          | -2.73                                                                            | 3.27                                       | 0.4328                                    | 4.3291                                           |
| 33.00       | 0.999294                        | 1522.43                     | -131.36                                       | -130.81                                          | -2.93                                                                            | 3.35                                       | 0.4317                                    | 4.3187                                           |
| 34.00       | 0.998955                        | 1524.44                     | -144.30                                       | -120.83                                          | -2.73                                                                            | 3.44                                       | 0.4308                                    | 4.3087                                           |
| 35.00       | 0.998607                        | 1526.40                     | -157.22                                       | -104.85                                          | -2.48                                                                            | 3.51                                       | 0.4298                                    | 4.2990                                           |
| 36.00       | 0.998254                        | 1528.30                     | -143.94                                       | -66.80                                           | -2.26                                                                            | 3.58                                       | 0.4289                                    | 4.2898                                           |
| 37.00       | 0.997892                        | 1530.13                     | -156.84                                       | -24.72                                           | -1.78                                                                            | 3.65                                       | 0.4280                                    | 4.2810                                           |
| 38.00       | 0.997525                        | 1531.92                     | -156.65                                       | 31.43                                            | -1.30                                                                            | 3.72                                       | 0.4272                                    | 4.2725                                           |
| 39.00       | 0.997149                        | 1533.63                     | -143.44                                       | 79.59                                            | -1.00                                                                            | 3.81                                       | 0.4264                                    | 4.2645                                           |
| 40.00       | 0.996765                        | 1535.28                     | -143.29                                       | 119.76                                           | -0.66                                                                            | 3.89                                       | 0.4256                                    | 4.2569                                           |
| 41.00       | 0.996373                        | 1536.90                     | -117.11                                       | 167.99                                           | -0.48                                                                            | 3.97                                       | 0.4249                                    | 4.2496                                           |
| 42.00       | 0.995974                        | 1538.42                     | -142.99                                       | 208.23                                           | 0.09                                                                             | 4.04                                       | 0.4242                                    | 4.2427                                           |
| 43.00       | 0.995569                        | 1539.90                     | -142.86                                       | 246.49                                           | 0.41                                                                             | 4.11                                       | 0.4236                                    | 4.2362                                           |
| 44.00       | 0.995156                        | 1541.32                     | -142.72                                       | 272.72                                           | 0.63                                                                             | 4.18                                       | 0.4230                                    | 4.2301                                           |
| 45.00       | 0.994736                        | 1542.70                     | -129.63                                       | 300.98                                           | 0.75                                                                             | 4.26                                       | 0.4224                                    | 4.2243                                           |
| 46.00       | 0.994310                        | 1544.00                     | -129.53                                       | 323.24                                           | 0.94                                                                             | 4.32                                       | 0.4219                                    | 4.2190                                           |
| 47.00       | 0.993877                        | 1545.25                     | -129.42                                       | 339.48                                           | 1.07                                                                             | 4.40                                       | 0.4214                                    | 4.2139                                           |
| 48.00       | 0.993434                        | 1546.45                     | -116.39                                       | 355.73                                           | 1.10                                                                             | 4.49                                       | 0.4209                                    | 4.2093                                           |
| 49.00       | 0.992985                        | 1547.59                     | -116.30                                       | 367.98                                           | 1.20                                                                             | 4.64                                       | 0.4205                                    | 4.2050                                           |
| 50.00       | 0.992512                        | 1548.69                     | -116.22                                       | 410.47                                           | 1.55                                                                             | 4.75                                       | 0.4201                                    | 4.2009                                           |
| 51.00       | 0.992041                        | 1549.73                     | -103.24                                       | 436.87                                           | 1.66                                                                             | 4.71                                       | 0.4197                                    | 4.1973                                           |
| 52.00       | 0.991578                        | 1550.73                     | -90.28                                        | 429.01                                           | 1.48                                                                             | 4.71                                       | 0.4194                                    | 4.1939                                           |
| 53.00       | 0.991107                        | 1551.67                     | -64.44                                        | 431.23                                           | 1.28                                                                             | 4.61                                       | 0.4191                                    | 4.1909                                           |
| 54.00       | 0.990664                        | 1552.56                     | -51.53                                        | 356.73                                           | 0.55                                                                             | 4.69                                       | 0.4188                                    | 4.1882                                           |
| 55.00       | 0.990178                        | 1553.40                     | -38.62                                        | 362.96                                           | 0.49                                                                             | 4.93                                       | 0.4185                                    | 4.1858                                           |
| 56.00       | 0.989688                        | 1554.19                     | -25.74                                        | 363.14                                           | 0.38                                                                             | 4.99                                       | 0.4183                                    | 4.1836                                           |
| 57.00       | 0.989191                        | 1554.94                     | 12.86                                         | 365.35                                           | 0.08                                                                             | 5.04                                       | 0.4181                                    | 4.1818                                           |
| 58.00       | 0.988690                        | 1555.63                     | 12.86                                         | 363.51                                           | 0.06                                                                             | 5.10                                       | 0.4180                                    | 4.1803                                           |
| 59.00       | 0.988183                        | 1556.28                     | 38.55                                         | 357.62                                           | -0.21                                                                            | 5.17                                       | 0.4178                                    | 4.1790                                           |
| 60.00       | 0.987669                        | 1556.89                     | 51.39                                         | 359.84                                           | -0.30                                                                            | 5.22                                       | 0.4177                                    | 4.1780                                           |
| 61.00       | 0.987152                        | 1557.45                     | 64.21                                         | 358.00                                           | -0.42                                                                            | 5.29                                       | 0.4176                                    | 4.1772                                           |
| 62.00       | 0.986626                        | 1557.97                     | 89.86                                         | 356.16                                           | -0.65                                                                            | 5.36                                       | 0.4176                                    | 4.1768                                           |
| 63.00       | 0.986095                        | 1558.46                     | 115.51                                        | 354.33                                           | -0.88                                                                            | 5.41                                       | 0.4175                                    | 4.1765                                           |
| 64.00       | 0.985558                        | 1558.88                     | 115.47                                        | 340.31                                           | -1.00                                                                            | 5.48                                       | 0.4175                                    | 4.1766                                           |
| 65.00       | 0.985014                        | 1559.27                     | 166.76                                        | 277.56                                           | -1.96                                                                            | 5.55                                       | 0.4176                                    | 4.1771                                           |

**Table S.16.**

Measured and calculated values for  $\rho$ ,  $u$ ,  $[U]$ ,  $\phi V$ ,  $\phi K_S$ ,  $\alpha$ ,  $K_S$  and  $\beta_{S0}$  in the 25 to 65 °C temperature range. poly(rA)-poly(rU) for 10% (v/v) EtOH.  $C_p = 5.04 \times 10^{-4} \text{ M}_{BP}$ ,  $I = 0.1 \text{ M (NaCl)}$ ,  $pH = 7.0$ .

| $T$<br>(°C) | $\rho$<br>(g cm <sup>-3</sup> ) | $u$<br>(m s <sup>-1</sup> ) | $[U]$<br>(cm <sup>3</sup> mol <sup>-1</sup> ) | $\phi V$<br>(cm <sup>3</sup> mol <sup>-1</sup> ) | $10^2 \times \phi K_S$<br>(cm <sup>3</sup> mol <sup>-1</sup> bar <sup>-1</sup> ) | $10^4 \times \alpha$<br>(K <sup>-1</sup> ) | $10^5 \times K_S$<br>(bar <sup>-1</sup> ) | $10^5 \times \beta_{S0}$<br>(bar <sup>-1</sup> ) |
|-------------|---------------------------------|-----------------------------|-----------------------------------------------|--------------------------------------------------|----------------------------------------------------------------------------------|--------------------------------------------|-------------------------------------------|--------------------------------------------------|
| 25.00       | 0.98940                         | 1554.55                     | -2893.76                                      | -1081.52                                         | 12.26                                                                            | 2.98                                       | 0.4182                                    | 4.1739                                           |
| 26.00       | 0.989105                        | 1556.00                     | -2662.13                                      | -1101.94                                         | 10.14                                                                            | 3.01                                       | 0.4176                                    | 4.1683                                           |
| 27.00       | 0.988804                        | 1557.39                     | -2265.70                                      | -1124.38                                         | 6.64                                                                             | 3.08                                       | 0.4170                                    | 4.1639                                           |
| 28.00       | 0.988496                        | 1558.72                     | -1780.93                                      | -1148.86                                         | 2.40                                                                             | 3.13                                       | 0.4164                                    | 4.1602                                           |
| 29.00       | 0.988185                        | 1560.01                     | -1207.83                                      | -1187.44                                         | -2.69                                                                            | 3.16                                       | 0.4158                                    | 4.1571                                           |
| 30.00       | 0.987871                        | 1561.24                     | -597.27                                       | -1238.12                                         | -8.18                                                                            | 3.21                                       | 0.4153                                    | 4.1545                                           |
| 31.00       | 0.987551                        | 1562.41                     | -165.12                                       | -1294.88                                         | -12.24                                                                           | 3.30                                       | 0.4148                                    | 4.1516                                           |
| 32.00       | 0.987220                        | 1563.52                     | 203.11                                        | -1341.63                                         | -15.68                                                                           | 3.38                                       | 0.4144                                    | 4.1487                                           |
| 33.00       | 0.986884                        | 1564.60                     | 545.58                                        | -1398.50                                         | -18.98                                                                           | 3.45                                       | 0.4139                                    | 4.1459                                           |
| 34.00       | 0.986539                        | 1565.60                     | 748.19                                        | -1455.41                                         | -21.12                                                                           | 3.55                                       | 0.4135                                    | 4.1431                                           |
| 35.00       | 0.986183                        | 1566.56                     | 849.16                                        | -1506.34                                         | -22.36                                                                           | 3.66                                       | 0.4132                                    | 4.1400                                           |
| 36.00       | 0.985818                        | 1567.47                     | 912.03                                        | -1553.29                                         | -23.25                                                                           | 3.77                                       | 0.4129                                    | 4.1371                                           |
| 37.00       | 0.985439                        | 1568.32                     | 949.53                                        | -1592.23                                         | -23.87                                                                           | 3.88                                       | 0.4126                                    | 4.1344                                           |
| 38.00       | 0.985052                        | 1569.13                     | 999.68                                        | -1627.17                                         | -24.56                                                                           | 3.98                                       | 0.4123                                    | 4.1321                                           |
| 39.00       | 0.984654                        | 1569.87                     | 1011.87                                       | -1658.12                                         | -24.91                                                                           | 4.10                                       | 0.4121                                    | 4.1300                                           |
| 40.00       | 0.984245                        | 1570.58                     | 1024.06                                       | -1674.98                                         | -25.14                                                                           | 4.20                                       | 0.4119                                    | 4.1280                                           |
| 41.00       | 0.983827                        | 1571.22                     | 1023.64                                       | -1697.93                                         | -25.31                                                                           | 4.30                                       | 0.4117                                    | 4.1265                                           |
| 42.00       | 0.983398                        | 1571.84                     | 1048.52                                       | -1712.82                                         | -25.63                                                                           | 4.40                                       | 0.4116                                    | 4.1251                                           |
| 43.00       | 0.982962                        | 1572.39                     | 1048.15                                       | -1721.68                                         | -25.70                                                                           | 4.49                                       | 0.4115                                    | 4.1241                                           |
| 44.00       | 0.982515                        | 1572.89                     | 1035.18                                       | -1726.51                                         | -25.63                                                                           | 4.58                                       | 0.4114                                    | 4.1233                                           |
| 45.00       | 0.982063                        | 1573.34                     | 1009.63                                       | -1733.38                                         | -25.47                                                                           | 4.66                                       | 0.4114                                    | 4.1228                                           |
| 46.00       | 0.981600                        | 1573.75                     | 996.75                                        | -1734.20                                         | -25.37                                                                           | 4.75                                       | 0.4113                                    | 4.1225                                           |
| 47.00       | 0.981131                        | 1574.11                     | 983.90                                        | -1733.00                                         | -25.26                                                                           | 4.82                                       | 0.4113                                    | 4.1225                                           |
| 48.00       | 0.980655                        | 1574.44                     | 983.69                                        | -1733.84                                         | -25.27                                                                           | 4.88                                       | 0.4114                                    | 4.1228                                           |
| 49.00       | 0.980174                        | 1574.71                     | 958.29                                        | -1734.70                                         | -25.07                                                                           | 4.94                                       | 0.4114                                    | 4.1233                                           |
| 50.00       | 0.979687                        | 1574.93                     | 932.93                                        | -1731.50                                         | -24.84                                                                           | 5.01                                       | 0.4115                                    | 4.1241                                           |
| 51.00       | 0.979192                        | 1575.12                     | 920.21                                        | -1722.22                                         | -24.67                                                                           | 5.09                                       | 0.4116                                    | 4.1251                                           |
| 52.00       | 0.978690                        | 1575.24                     | 869.70                                        | -1714.98                                         | -24.20                                                                           | 5.15                                       | 0.4118                                    | 4.1264                                           |
| 53.00       | 0.978183                        | 1575.33                     | 831.82                                        | -1687.40                                         | -23.67                                                                           | 5.23                                       | 0.4119                                    | 4.1278                                           |
| 54.00       | 0.977668                        | 1575.37                     | 781.37                                        | -1655.75                                         | -23.00                                                                           | 5.30                                       | 0.4121                                    | 4.1295                                           |
| 55.00       | 0.977147                        | 1575.37                     | 756.15                                        | -1611.86                                         | -22.44                                                                           | 5.36                                       | 0.4124                                    | 4.1315                                           |
| 56.00       | 0.976619                        | 1575.32                     | 718.35                                        | -1543.51                                         | -21.58                                                                           | 5.40                                       | 0.4126                                    | 4.1337                                           |
| 57.00       | 0.976092                        | 1575.22                     | 655.36                                        | -1466.93                                         | -20.44                                                                           | 5.46                                       | 0.4129                                    | 4.1361                                           |
| 58.00       | 0.975554                        | 1575.08                     | 617.60                                        | -1400.49                                         | -19.59                                                                           | 5.55                                       | 0.4132                                    | 4.1388                                           |
| 59.00       | 0.975009                        | 1574.90                     | 554.62                                        | -1307.48                                         | -18.31                                                                           | 5.61                                       | 0.4135                                    | 4.1416                                           |
| 60.00       | 0.974460                        | 1574.69                     | 516.87                                        | -1202.14                                         | -17.14                                                                           | 5.67                                       | 0.4139                                    | 4.1446                                           |
| 61.00       | 0.973904                        | 1574.42                     | 453.90                                        | -1086.50                                         | -15.67                                                                           | 5.74                                       | 0.4142                                    | 4.1479                                           |
| 62.00       | 0.973343                        | 1574.13                     | 353.08                                        | -964.62                                          | -13.84                                                                           | 5.79                                       | 0.4146                                    | 4.1512                                           |
| 63.00       | 0.972777                        | 1573.78                     | 277.47                                        | -828.32                                          | -12.09                                                                           | 5.85                                       | 0.4150                                    | 4.1548                                           |
| 64.00       | 0.972205                        | 1573.61                     | 517.22                                        | -681.67                                          | -12.88                                                                           | 5.91                                       | 0.4154                                    | 4.1589                                           |
| 65.00       | 0.971629                        | 1572.79                     | -176.64                                       | -549.17                                          | -6.01                                                                            | 5.97                                       | 0.4161                                    | 4.1625                                           |

**Table S.17.**

Measured and calculated values for  $\rho$ ,  $u$ ,  $[U]$ ,  $\phi V$ ,  $\phi K_S$ ,  $\alpha$ ,  $K_S$  and  $\beta_{S0}$  in the 25 to 65 °C temperature range. poly(rA)-poly(rU) for 20% (v/v) EtOH.  $C_p = 5.09 \times 10^{-4} \text{ M}_{BP}$ ,  $I = 0.1 \text{ M (NaCl)}$ ,  $pH = 7.0$ .

| $T$<br>(°C) | $\rho$<br>(g cm <sup>-3</sup> ) | $u$<br>(m s <sup>-1</sup> ) | $[U]$<br>(cm <sup>3</sup> mol <sup>-1</sup> ) | $\phi V$<br>(cm <sup>3</sup> mol <sup>-1</sup> ) | $10^2 \times \phi K_S$<br>(cm <sup>3</sup> mol <sup>-1</sup> bar <sup>-1</sup> ) | $10^4 \times \alpha$<br>(K <sup>-1</sup> ) | $10^5 \times K_S$<br>(bar <sup>-1</sup> ) | $10^5 \times \beta_{S0}$<br>(bar <sup>-1</sup> ) |
|-------------|---------------------------------|-----------------------------|-----------------------------------------------|--------------------------------------------------|----------------------------------------------------------------------------------|--------------------------------------------|-------------------------------------------|--------------------------------------------------|
| 25.00       | 0.979152                        | 1600.01                     | -1755.22                                      | -438.68                                          | 7.73                                                                             | 3.95                                       | 0.3989                                    | 3.9845                                           |
| 26.00       | 0.978765                        | 1600.09                     | -1693.82                                      | -479.05                                          | 6.92                                                                             | 3.97                                       | 0.3991                                    | 3.9861                                           |
| 27.00       | 0.978374                        | 1600.12                     | -1656.99                                      | -501.36                                          | 6.45                                                                             | 4.05                                       | 0.3992                                    | 3.9877                                           |
| 28.00       | 0.977973                        | 1600.11                     | -1632.48                                      | -517.66                                          | 6.12                                                                             | 4.13                                       | 0.3994                                    | 3.9895                                           |
| 29.00       | 0.977566                        | 1600.06                     | -1595.73                                      | -542.03                                          | 5.64                                                                             | 4.21                                       | 0.3996                                    | 3.9916                                           |
| 30.00       | 0.977150                        | 1599.98                     | -1534.48                                      | -562.39                                          | 4.99                                                                             | 4.29                                       | 0.3998                                    | 3.9940                                           |
| 31.00       | 0.976727                        | 1599.86                     | -1497.80                                      | -590.84                                          | 4.47                                                                             | 4.38                                       | 0.4000                                    | 3.9965                                           |
| 32.00       | 0.976296                        | 1599.70                     | -1461.14                                      | -591.10                                          | 4.17                                                                             | 4.46                                       | 0.4003                                    | 3.9993                                           |
| 33.00       | 0.975856                        | 1599.50                     | -1412.24                                      | -601.45                                          | 3.70                                                                             | 4.55                                       | 0.4005                                    | 4.0023                                           |
| 34.00       | 0.975408                        | 1599.27                     | -1363.34                                      | -619.88                                          | 3.16                                                                             | 4.64                                       | 0.4008                                    | 4.0055                                           |
| 35.00       | 0.974951                        | 1598.99                     | -1339.03                                      | -628.24                                          | 2.90                                                                             | 4.73                                       | 0.4012                                    | 4.0089                                           |
| 36.00       | 0.974486                        | 1598.68                     | -1241.06                                      | -634.60                                          | 2.07                                                                             | 4.80                                       | 0.4015                                    | 4.0128                                           |
| 37.00       | 0.974015                        | 1598.34                     | -1130.77                                      | -649.05                                          | 1.07                                                                             | 4.89                                       | 0.4019                                    | 4.0169                                           |
| 38.00       | 0.973533                        | 1597.96                     | -1081.89                                      | -655.43                                          | 0.62                                                                             | 4.99                                       | 0.4023                                    | 4.0210                                           |
| 39.00       | 0.973043                        | 1597.53                     | -1033.02                                      | -653.74                                          | 0.24                                                                             | 5.05                                       | 0.4027                                    | 4.0254                                           |
| 40.00       | 0.972550                        | 1597.08                     | -971.83                                       | -664.19                                          | -0.34                                                                            | 5.13                                       | 0.4031                                    | 4.0300                                           |
| 41.00       | 0.972045                        | 1596.58                     | -922.94                                       | -666.56                                          | -0.75                                                                            | 5.22                                       | 0.4036                                    | 4.0348                                           |
| 42.00       | 0.971536                        | 1596.05                     | -886.33                                       | -672.98                                          | -1.10                                                                            | 5.29                                       | 0.4041                                    | 4.0398                                           |
| 43.00       | 0.971017                        | 1595.48                     | -849.72                                       | -671.32                                          | -1.39                                                                            | 5.36                                       | 0.4046                                    | 4.0450                                           |
| 44.00       | 0.970495                        | 1594.89                     | -788.46                                       | -679.79                                          | -1.96                                                                            | 5.44                                       | 0.4051                                    | 4.0504                                           |
| 45.00       | 0.969962                        | 1594.26                     | -739.49                                       | -680.16                                          | -2.36                                                                            | 5.48                                       | 0.4056                                    | 4.0561                                           |
| 46.00       | 0.969432                        | 1593.59                     | -702.83                                       | -694.74                                          | -2.78                                                                            | 5.52                                       | 0.4062                                    | 4.0619                                           |
| 47.00       | 0.968893                        | 1592.89                     | -592.15                                       | -711.38                                          | -3.82                                                                            | 5.61                                       | 0.4068                                    | 4.0682                                           |
| 48.00       | 0.968344                        | 1592.15                     | -543.07                                       | -717.88                                          | -4.29                                                                            | 5.71                                       | 0.4074                                    | 4.0745                                           |
| 49.00       | 0.967788                        | 1591.38                     | -493.95                                       | -718.29                                          | -4.70                                                                            | 5.78                                       | 0.4080                                    | 4.0810                                           |
| 50.00       | 0.967226                        | 1590.57                     | -407.73                                       | -726.84                                          | -5.48                                                                            | 5.84                                       | 0.4087                                    | 4.0879                                           |
| 51.00       | 0.966659                        | 1589.73                     | -346.15                                       | -731.34                                          | -6.03                                                                            | 5.90                                       | 0.4093                                    | 4.0949                                           |
| 52.00       | 0.966084                        | 1588.86                     | -284.50                                       | -733.81                                          | -6.57                                                                            | 5.97                                       | 0.4100                                    | 4.1021                                           |
| 53.00       | 0.965505                        | 1587.94                     | -235.17                                       | -742.41                                          | -7.06                                                                            | 6.04                                       | 0.4107                                    | 4.1095                                           |
| 54.00       | 0.964918                        | 1587.00                     | -173.39                                       | -740.82                                          | -7.57                                                                            | 6.11                                       | 0.4115                                    | 4.1172                                           |
| 55.00       | 0.964325                        | 1586.02                     | -86.75                                        | -743.32                                          | -8.33                                                                            | 6.16                                       | 0.4122                                    | 4.1252                                           |
| 56.00       | 0.963728                        | 1585.03                     | -37.20                                        | -747.86                                          | -8.79                                                                            | 6.24                                       | 0.4130                                    | 4.1331                                           |
| 57.00       | 0.963123                        | 1584.00                     | 37.23                                         | -750.37                                          | -9.45                                                                            | 6.31                                       | 0.4138                                    | 4.1414                                           |
| 58.00       | 0.962512                        | 1582.96                     | 99.35                                         | -752.90                                          | -10.00                                                                           | 6.37                                       | 0.4146                                    | 4.1497                                           |
| 59.00       | 0.961897                        | 1581.89                     | 198.84                                        | -757.47                                          | -10.89                                                                           | 6.42                                       | 0.4155                                    | 4.1584                                           |
| 60.00       | 0.961277                        | 1580.81                     | 286.03                                        | -764.10                                          | -11.70                                                                           | 6.50                                       | 0.4163                                    | 4.1672                                           |
| 61.00       | 0.960647                        | 1579.69                     | 348.47                                        | -760.50                                          | -12.22                                                                           | 6.58                                       | 0.4172                                    | 4.1761                                           |
| 62.00       | 0.960012                        | 1578.58                     | 460.83                                        | -758.96                                          | -13.17                                                                           | 6.64                                       | 0.4180                                    | 4.1852                                           |
| 63.00       | 0.959373                        | 1577.45                     | 585.84                                        | -761.51                                          | -14.28                                                                           | 6.70                                       | 0.4189                                    | 4.1945                                           |
| 64.00       | 0.958726                        | 1576.19                     | 573.83                                        | -759.98                                          | -14.20                                                                           | 6.77                                       | 0.4198                                    | 4.2040                                           |
| 65.00       | 0.958075                        | 1576.08                     | 2047.50                                       | -760.49                                          | -26.65                                                                           | 6.85                                       | 0.4202                                    | 4.2138                                           |

**Table S.18.**

Measured and calculated values for  $\rho$ ,  $u$ ,  $[U]$ ,  $\phi V$ ,  $\phi K_S$ ,  $\alpha$ ,  $K_S$  and  $\beta_{S0}$  in the 25 to 65 °C temperature range. poly(rA)-poly(rU) for 30% (v/v) EtOH.  $C_p = 5.13 \times 10^{-4} \text{ M}_{BP}$ ,  $I = 0.1 \text{ M (NaCl)}$ ,  $pH = 7.0$ .

| $T$<br>(°C) | $\rho$<br>(g cm <sup>-3</sup> ) | $U$<br>(m s <sup>-1</sup> ) | $[U]$<br>(cm <sup>3</sup> mol <sup>-1</sup> ) | $\phi V$<br>(cm <sup>3</sup> mol <sup>-1</sup> ) | $10^2 \times \phi K_S$<br>(cm <sup>3</sup> mol <sup>-1</sup> bar <sup>-1</sup> ) | $10^4 \times \alpha$<br>(K <sup>-1</sup> ) | $10^5 \times K_S$<br>(bar <sup>-1</sup> ) | $10^5 \times \beta_{S0}$<br>(bar <sup>-1</sup> ) |
|-------------|---------------------------------|-----------------------------|-----------------------------------------------|--------------------------------------------------|----------------------------------------------------------------------------------|--------------------------------------------|-------------------------------------------|--------------------------------------------------|
| 25.00       | 0.96543                         | 1623.21                     | -239.99                                       | 6028.18                                          | 46.39                                                                            | 5.90                                       | 0.3931                                    | 3.9195                                           |
| 26.00       | 0.964859                        | 1621.55                     | -540.45                                       | 6136.11                                          | 49.70                                                                            | 5.80                                       | 0.3942                                    | 3.9285                                           |
| 27.00       | 0.964310                        | 1619.90                     | -853.44                                       | 6183.77                                          | 52.65                                                                            | 5.72                                       | 0.3952                                    | 3.9373                                           |
| 28.00       | 0.963756                        | 1618.22                     | -1166.99                                      | 6229.51                                          | 55.61                                                                            | 5.75                                       | 0.3962                                    | 3.9464                                           |
| 29.00       | 0.963202                        | 1616.52                     | -1505.17                                      | 6267.26                                          | 58.71                                                                            | 5.77                                       | 0.3973                                    | 3.9555                                           |
| 30.00       | 0.962643                        | 1614.81                     | -1819.88                                      | 6301.05                                          | 61.61                                                                            | 5.81                                       | 0.3984                                    | 3.9649                                           |
| 31.00       | 0.962082                        | 1613.10                     | -2062.85                                      | 6324.84                                          | 63.88                                                                            | 5.86                                       | 0.3995                                    | 3.9746                                           |
| 32.00       | 0.961516                        | 1611.38                     | -2354.53                                      | 6346.68                                          | 66.53                                                                            | 5.90                                       | 0.4005                                    | 3.9842                                           |
| 33.00       | 0.960947                        | 1609.63                     | -2658.87                                      | 6356.47                                          | 69.20                                                                            | 5.94                                       | 0.4017                                    | 3.9939                                           |
| 34.00       | 0.960375                        | 1607.90                     | -2927.50                                      | 6370.32                                          | 71.63                                                                            | 6.02                                       | 0.4028                                    | 4.0038                                           |
| 35.00       | 0.959791                        | 1606.13                     | -3220.89                                      | 6392.34                                          | 74.34                                                                            | 6.12                                       | 0.4039                                    | 4.0138                                           |
| 36.00       | 0.959201                        | 1604.36                     | -3526.93                                      | 6414.43                                          | 77.16                                                                            | 6.18                                       | 0.4050                                    | 4.0238                                           |
| 37.00       | 0.958605                        | 1602.57                     | -3797.28                                      | 6438.60                                          | 79.74                                                                            | 6.27                                       | 0.4062                                    | 4.0341                                           |
| 38.00       | 0.957997                        | 1600.77                     | -4031.83                                      | 6470.96                                          | 82.10                                                                            | 6.41                                       | 0.4074                                    | 4.0447                                           |
| 39.00       | 0.957378                        | 1598.96                     | -4254.75                                      | 6515.57                                          | 84.49                                                                            | 6.49                                       | 0.4085                                    | 4.0555                                           |
| 40.00       | 0.956754                        | 1597.12                     | -4526.77                                      | 6564.32                                          | 87.32                                                                            | 6.56                                       | 0.4098                                    | 4.0663                                           |
| 41.00       | 0.956121                        | 1595.27                     | -4775.06                                      | 6613.19                                          | 89.98                                                                            | 6.66                                       | 0.4110                                    | 4.0773                                           |
| 42.00       | 0.955481                        | 1593.34                     | -5084.94                                      | 6670.27                                          | 93.22                                                                            | 6.72                                       | 0.4123                                    | 4.0885                                           |
| 43.00       | 0.954837                        | 1591.47                     | -5370.92                                      | 6717.32                                          | 96.20                                                                            | 6.78                                       | 0.4135                                    | 4.0995                                           |
| 44.00       | 0.954185                        | 1589.58                     | -5584.45                                      | 6778.68                                          | 98.73                                                                            | 6.86                                       | 0.4148                                    | 4.1111                                           |
| 45.00       | 0.953528                        | 1587.66                     | -5847.34                                      | 6834.08                                          | 101.63                                                                           | 6.91                                       | 0.4161                                    | 4.1226                                           |
| 46.00       | 0.952867                        | 1585.73                     | -6184.07                                      | 6889.57                                          | 105.15                                                                           | 6.97                                       | 0.4174                                    | 4.1340                                           |
| 47.00       | 0.952200                        | 1583.77                     | -6387.23                                      | 6947.21                                          | 107.62                                                                           | 7.04                                       | 0.4187                                    | 4.1461                                           |
| 48.00       | 0.951527                        | 1581.80                     | -6603.12                                      | 7002.95                                          | 110.20                                                                           | 7.09                                       | 0.4200                                    | 4.1584                                           |
| 49.00       | 0.950852                        | 1579.83                     | -6782.77                                      | 7052.67                                          | 112.44                                                                           | 7.11                                       | 0.4214                                    | 4.1708                                           |
| 50.00       | 0.950174                        | 1577.86                     | -6962.83                                      | 7100.44                                          | 114.68                                                                           | 7.17                                       | 0.4227                                    | 4.1833                                           |
| 51.00       | 0.949489                        | 1575.92                     | -7069.55                                      | 7152.40                                          | 116.36                                                                           | 7.23                                       | 0.4241                                    | 4.1961                                           |
| 52.00       | 0.948800                        | 1574.01                     | -7164.10                                      | 7202.43                                          | 117.93                                                                           | 7.29                                       | 0.4254                                    | 4.2088                                           |
| 53.00       | 0.948105                        | 1572.05                     | -7345.19                                      | 7252.58                                          | 120.24                                                                           | 7.36                                       | 0.4268                                    | 4.2215                                           |
| 54.00       | 0.947405                        | 1570.06                     | -7502.22                                      | 7302.84                                          | 122.36                                                                           | 7.41                                       | 0.4282                                    | 4.2346                                           |
| 55.00       | 0.946701                        | 1568.09                     | -7634.87                                      | 7359.32                                          | 124.34                                                                           | 7.46                                       | 0.4296                                    | 4.2477                                           |
| 56.00       | 0.945993                        | 1566.13                     | -7804.81                                      | 7403.66                                          | 126.55                                                                           | 7.51                                       | 0.4310                                    | 4.2606                                           |
| 57.00       | 0.945280                        | 1564.22                     | -7851.36                                      | 7454.23                                          | 127.77                                                                           | 7.55                                       | 0.4324                                    | 4.2740                                           |
| 58.00       | 0.944565                        | 1562.31                     | -7873.29                                      | 7498.75                                          | 128.74                                                                           | 7.62                                       | 0.4337                                    | 4.2875                                           |
| 59.00       | 0.943840                        | 1560.34                     | -8007.02                                      | 7555.71                                          | 130.78                                                                           | 7.69                                       | 0.4352                                    | 4.3009                                           |
| 60.00       | 0.943113                        | 1558.47                     | -8028.99                                      | 7610.72                                          | 131.85                                                                           | 7.76                                       | 0.4366                                    | 4.3143                                           |
| 61.00       | 0.942377                        | 1556.58                     | -8274.49                                      | 7669.99                                          | 134.87                                                                           | 7.80                                       | 0.4380                                    | 4.3270                                           |
| 62.00       | 0.941642                        | 1554.73                     | -8781.10                                      | 7723.17                                          | 140.08                                                                           | 7.86                                       | 0.4393                                    | 4.3383                                           |
| 63.00       | 0.940898                        | 1552.96                     | -8567.28                                      | 7784.74                                          | 139.21                                                                           | 7.95                                       | 0.4407                                    | 4.3524                                           |
| 64.00       | 0.940147                        | 1551.25                     | -8377.50                                      | 7838.23                                          | 138.46                                                                           | 8.00                                       | 0.4420                                    | 4.3662                                           |
| 65.00       | 0.939394                        | 1549.50                     | -8112.68                                      | 7877.41                                          | 136.94                                                                           | 8.07                                       | 0.4434                                    | 4.3807                                           |

**Table S.19.**

Measured and calculated values for  $\rho$ ,  $u$ ,  $[U]$ ,  $\phi V$ ,  $\phi K_S$ ,  $\alpha$ ,  $K_S$  and  $\beta_{S0}$  in the 25 to 65 °C temperature range. poly(rA)-poly(rU) for 40% (v/v) EtOH.  $C_P = 5.17 \times 10^{-4} \text{ M}_{BP}$ ,  $I = 0.1 \text{ M}$  (NaCl),  $pH = 7.0$ .

| $T$<br>(°C) | $\rho$<br>(g cm <sup>-3</sup> ) | $u$<br>(m s <sup>-1</sup> ) | $[U]$<br>(cm <sup>3</sup> mol <sup>-1</sup> ) | $\phi V$<br>(cm <sup>3</sup> mol <sup>-1</sup> ) | $10^2 \times \phi K_S$<br>(cm <sup>3</sup> mol <sup>-1</sup> bar <sup>-1</sup> ) | $10^4 \times \alpha$<br>(K <sup>-1</sup> ) | $10^5 \times K_S$<br>(bar <sup>-1</sup> ) | $10^5 \times \beta_{S0}$<br>(bar <sup>-1</sup> ) |
|-------------|---------------------------------|-----------------------------|-----------------------------------------------|--------------------------------------------------|----------------------------------------------------------------------------------|--------------------------------------------|-------------------------------------------|--------------------------------------------------|
| 25.00       | 0.949993                        | 1592.34                     | -5672.36                                      | 4268.88                                          | 78.97                                                                            | 7.19                                       | 0.4152                                    | 4.1197                                           |
| 26.00       | 0.949310                        | 1589.93                     | -5850.36                                      | 4298.35                                          | 80.96                                                                            | 7.18                                       | 0.4167                                    | 4.1343                                           |
| 27.00       | 0.948630                        | 1587.54                     | -5956.09                                      | 4301.42                                          | 82.16                                                                            | 7.19                                       | 0.4183                                    | 4.1493                                           |
| 28.00       | 0.947948                        | 1585.15                     | -6001.45                                      | 4304.51                                          | 82.86                                                                            | 7.20                                       | 0.4198                                    | 4.1646                                           |
| 29.00       | 0.947265                        | 1582.76                     | -6059.10                                      | 4297.43                                          | 83.59                                                                            | 7.23                                       | 0.4214                                    | 4.1799                                           |
| 30.00       | 0.946578                        | 1580.36                     | -6116.96                                      | 4294.44                                          | 84.36                                                                            | 7.27                                       | 0.4230                                    | 4.1955                                           |
| 31.00       | 0.945890                        | 1577.95                     | -6175.03                                      | 4283.29                                          | 85.06                                                                            | 7.30                                       | 0.4246                                    | 4.2111                                           |
| 32.00       | 0.945196                        | 1575.53                     | -6257.72                                      | 4280.31                                          | 86.05                                                                            | 7.35                                       | 0.4262                                    | 4.2268                                           |
| 33.00       | 0.944500                        | 1573.10                     | -6304.03                                      | 4273.25                                          | 86.71                                                                            | 7.38                                       | 0.4278                                    | 4.2428                                           |
| 34.00       | 0.943801                        | 1570.69                     | -6338.16                                      | 4264.15                                          | 87.25                                                                            | 7.46                                       | 0.4295                                    | 4.2589                                           |
| 35.00       | 0.943092                        | 1568.27                     | -6360.17                                      | 4267.35                                          | 87.79                                                                            | 7.53                                       | 0.4311                                    | 4.2751                                           |
| 36.00       | 0.942382                        | 1565.85                     | -6394.53                                      | 4264.42                                          | 88.40                                                                            | 7.57                                       | 0.4328                                    | 4.2914                                           |
| 37.00       | 0.941666                        | 1563.41                     | -6478.27                                      | 4269.71                                          | 89.50                                                                            | 7.64                                       | 0.4345                                    | 4.3077                                           |
| 38.00       | 0.940943                        | 1560.94                     | -6562.39                                      | 4277.08                                          | 90.63                                                                            | 7.71                                       | 0.4362                                    | 4.3243                                           |
| 39.00       | 0.940215                        | 1558.49                     | -6609.67                                      | 4290.64                                          | 91.51                                                                            | 7.76                                       | 0.4379                                    | 4.3410                                           |
| 40.00       | 0.939484                        | 1556.01                     | -6706.65                                      | 4306.28                                          | 92.84                                                                            | 7.82                                       | 0.4396                                    | 4.3578                                           |
| 41.00       | 0.938745                        | 1553.53                     | -6729.70                                      | 4326.09                                          | 93.58                                                                            | 7.88                                       | 0.4414                                    | 4.3750                                           |
| 42.00       | 0.938003                        | 1551.04                     | -6814.82                                      | 4345.95                                          | 94.86                                                                            | 7.95                                       | 0.4431                                    | 4.3921                                           |
| 43.00       | 0.937254                        | 1548.55                     | -6862.97                                      | 4367.93                                          | 95.86                                                                            | 7.99                                       | 0.4449                                    | 4.4095                                           |
| 44.00       | 0.936505                        | 1546.07                     | -6886.37                                      | 4389.94                                          | 96.64                                                                            | 8.04                                       | 0.4467                                    | 4.4270                                           |
| 45.00       | 0.935748                        | 1543.56                     | -6947.33                                      | 4420.26                                          | 97.83                                                                            | 8.10                                       | 0.4485                                    | 4.4447                                           |
| 46.00       | 0.934990                        | 1541.05                     | -7008.49                                      | 4444.46                                          | 98.98                                                                            | 8.13                                       | 0.4504                                    | 4.4625                                           |
| 47.00       | 0.934228                        | 1538.53                     | -7057.40                                      | 4466.64                                          | 100.01                                                                           | 8.16                                       | 0.4522                                    | 4.4805                                           |
| 48.00       | 0.933465                        | 1536.00                     | -7106.51                                      | 4486.81                                          | 101.04                                                                           | 8.21                                       | 0.4541                                    | 4.4986                                           |
| 49.00       | 0.932696                        | 1533.48                     | -7168.26                                      | 4509.10                                          | 102.21                                                                           | 8.26                                       | 0.4559                                    | 4.5168                                           |
| 50.00       | 0.931924                        | 1530.96                     | -7217.66                                      | 4533.51                                          | 103.29                                                                           | 8.30                                       | 0.4578                                    | 4.5352                                           |
| 51.00       | 0.931148                        | 1528.48                     | -7241.90                                      | 4555.90                                          | 104.13                                                                           | 8.36                                       | 0.4597                                    | 4.5535                                           |
| 52.00       | 0.930367                        | 1525.95                     | -7354.58                                      | 4576.29                                          | 105.76                                                                           | 8.40                                       | 0.4616                                    | 4.5719                                           |
| 53.00       | 0.929586                        | 1523.49                     | -7366.41                                      | 4596.72                                          | 106.48                                                                           | 8.43                                       | 0.4635                                    | 4.5904                                           |
| 54.00       | 0.928799                        | 1521.01                     | -7327.86                                      | 4627.58                                          | 106.85                                                                           | 8.49                                       | 0.4654                                    | 4.6094                                           |
| 55.00       | 0.928008                        | 1518.56                     | -7251.08                                      | 4654.36                                          | 106.83                                                                           | 8.53                                       | 0.4673                                    | 4.6285                                           |
| 56.00       | 0.927215                        | 1516.11                     | -7174.05                                      | 4679.11                                          | 106.78                                                                           | 8.57                                       | 0.4692                                    | 4.6478                                           |
| 57.00       | 0.926419                        | 1513.62                     | -7109.64                                      | 4693.52                                          | 106.76                                                                           | 8.61                                       | 0.4711                                    | 4.6674                                           |
| 58.00       | 0.925620                        | 1511.14                     | -7044.97                                      | 4716.30                                          | 106.82                                                                           | 8.65                                       | 0.4731                                    | 4.6870                                           |
| 59.00       | 0.924816                        | 1508.64                     | -7005.65                                      | 4734.98                                          | 107.07                                                                           | 8.70                                       | 0.4751                                    | 4.7068                                           |
| 60.00       | 0.924010                        | 1506.16                     | -6927.83                                      | 4755.79                                          | 106.98                                                                           | 8.75                                       | 0.4771                                    | 4.7268                                           |
| 61.00       | 0.923200                        | 1503.68                     | -6875.31                                      | 4772.47                                          | 107.09                                                                           | 8.79                                       | 0.4791                                    | 4.7467                                           |
| 62.00       | 0.922387                        | 1501.10                     | -7104.72                                      | 4793.38                                          | 109.91                                                                           | 8.83                                       | 0.4811                                    | 4.7661                                           |
| 63.00       | 0.921571                        | 1498.65                     | -7411.13                                      | 4805.98                                          | 113.38                                                                           | 8.87                                       | 0.4831                                    | 4.7844                                           |
| 64.00       | 0.920751                        | 1496.35                     | -7884.50                                      | 4824.90                                          | 118.50                                                                           | 8.90                                       | 0.4851                                    | 4.8010                                           |
| 65.00       | 0.919931                        | 1494.41                     | -7843.30                                      | 4837.57                                          | 118.64                                                                           | 8.91                                       | 0.4867                                    | 4.8179                                           |

**Table S.20.**

Measured and calculated values for  $\rho$ ,  $u$ ,  $[U]$ ,  $\phi V$ ,  $\phi K_S$ ,  $\alpha$ ,  $K_S$  and  $\beta_{S0}$  in the 25 to 65 °C temperature range. poly(rA)·poly(rU) for 50% (v/v) EtOH.  $C_P = 5.18 \times 10^{-4} \text{ M}_{BP}$ ,  $I = 0.1 \text{ M (NaCl)}$ ,  $pH = 7.0$ .

| $T$<br>(°C) | $\rho$<br>(g cm <sup>-3</sup> ) | $u$<br>(m s <sup>-1</sup> ) | $[U]$<br>(cm <sup>3</sup> mol <sup>-1</sup> ) | $\phi V$<br>(cm <sup>3</sup> mol <sup>-1</sup> ) | $10^2 \times \phi K_S$<br>(cm <sup>3</sup> mol <sup>-1</sup> bar <sup>-1</sup> ) | $10^4 \times \alpha$<br>(K <sup>-1</sup> ) | $10^5 \times K_S$<br>(bar <sup>-1</sup> ) | $10^5 \times \beta_{S0}$<br>(bar <sup>-1</sup> ) |
|-------------|---------------------------------|-----------------------------|-----------------------------------------------|--------------------------------------------------|----------------------------------------------------------------------------------|--------------------------------------------|-------------------------------------------|--------------------------------------------------|
| 25.00       |                                 |                             |                                               |                                                  |                                                                                  |                                            |                                           | 4.5299                                           |
| 26.00       | 0.931350                        | 1532.45                     | -3972.67                                      | 2472.50                                          | 55.33                                                                            | 2.97                                       | 0.4572                                    | 4.5492                                           |
| 27.00       | 0.930583                        | 1529.90                     | -3966.72                                      | 2486.96                                          | 55.63                                                                            | 3.06                                       | 0.4591                                    | 4.5681                                           |
| 28.00       | 0.929814                        | 1527.35                     | -3948.15                                      | 2495.23                                          | 55.77                                                                            | 3.16                                       | 0.4610                                    | 4.5872                                           |
| 29.00       | 0.929045                        | 1524.77                     | -3992.64                                      | 2501.44                                          | 56.46                                                                            | 3.26                                       | 0.4630                                    | 4.6064                                           |
| 30.00       | 0.928268                        | 1522.18                     | -4049.94                                      | 2515.98                                          | 57.36                                                                            | 3.35                                       | 0.4649                                    | 4.6256                                           |
| 31.00       | 0.927492                        | 1519.57                     | -4183.39                                      | 2522.24                                          | 58.89                                                                            | 3.44                                       | 0.4669                                    | 4.6447                                           |
| 32.00       | 0.926714                        | 1516.95                     | -4405.98                                      | 2532.67                                          | 61.30                                                                            | 3.53                                       | 0.4689                                    | 4.6636                                           |
| 33.00       | 0.925931                        | 1514.29                     | -4680.17                                      | 2547.29                                          | 64.25                                                                            | 3.61                                       | 0.4710                                    | 4.6826                                           |
| 34.00       | 0.925147                        | 1511.65                     | -4828.11                                      | 2549.45                                          | 65.93                                                                            | 3.71                                       | 0.4730                                    | 4.7022                                           |
| 35.00       | 0.924360                        | 1509.01                     | -4874.72                                      | 2557.87                                          | 66.73                                                                            | 3.79                                       | 0.4751                                    | 4.7225                                           |
| 36.00       | 0.923571                        | 1506.37                     | -4947.00                                      | 2564.22                                          | 67.76                                                                            | 3.87                                       | 0.4772                                    | 4.7427                                           |
| 37.00       | 0.922777                        | 1503.71                     | -5006.82                                      | 2574.77                                          | 68.72                                                                            | 3.95                                       | 0.4793                                    | 4.7633                                           |
| 38.00       | 0.921982                        | 1501.04                     | -5066.88                                      | 2585.35                                          | 69.70                                                                            | 4.03                                       | 0.4814                                    | 4.7840                                           |
| 39.00       | 0.921184                        | 1498.37                     | -5114.33                                      | 2593.86                                          | 70.54                                                                            | 4.13                                       | 0.4835                                    | 4.8050                                           |
| 40.00       | 0.920383                        | 1495.69                     | -5174.82                                      | 2600.30                                          | 71.49                                                                            | 4.22                                       | 0.4857                                    | 4.8261                                           |
| 41.00       | 0.919578                        | 1492.99                     | -5222.74                                      | 2615.14                                          | 72.41                                                                            | 4.30                                       | 0.4879                                    | 4.8475                                           |
| 42.00       | 0.918772                        | 1490.29                     | -5270.83                                      | 2630.01                                          | 73.34                                                                            | 4.38                                       | 0.4901                                    | 4.8691                                           |
| 43.00       | 0.917963                        | 1487.57                     | -5332.07                                      | 2634.42                                          | 74.31                                                                            | 4.46                                       | 0.4923                                    | 4.8909                                           |
| 44.00       | 0.917149                        | 1484.85                     | -5432.31                                      | 2649.36                                          | 75.77                                                                            | 4.54                                       | 0.4945                                    | 4.9127                                           |
| 45.00       | 0.916334                        | 1482.09                     | -5571.91                                      | 2662.22                                          | 77.61                                                                            | 4.62                                       | 0.4968                                    | 4.9346                                           |
| 46.00       | 0.915517                        | 1479.34                     | -5660.08                                      | 2670.91                                          | 78.92                                                                            | 4.69                                       | 0.4991                                    | 4.9569                                           |
| 47.00       | 0.914696                        | 1476.57                     | -5761.65                                      | 2679.62                                          | 80.37                                                                            | 4.79                                       | 0.5014                                    | 4.9795                                           |
| 48.00       | 0.913872                        | 1473.83                     | -5837.43                                      | 2694.68                                          | 81.64                                                                            | 4.88                                       | 0.5038                                    | 5.0021                                           |
| 49.00       | 0.913045                        | 1471.07                     | -5952.70                                      | 2705.55                                          | 83.28                                                                            | 5.05                                       | 0.5061                                    | 5.0248                                           |
| 50.00       | 0.912216                        | 1468.28                     | -6133.83                                      | 2708.01                                          | 85.50                                                                            | 5.17                                       | 0.5085                                    | 5.0475                                           |
| 51.00       | 0.911383                        | 1465.48                     | -6328.75                                      | 2723.16                                          | 88.02                                                                            | 5.13                                       | 0.5109                                    | 5.0704                                           |
| 52.00       | 0.910548                        | 1462.66                     | -6498.24                                      | 2727.77                                          | 90.19                                                                            | 5.13                                       | 0.5133                                    | 5.0937                                           |
| 53.00       | 0.909710                        | 1459.84                     | -6681.50                                      | 2738.75                                          | 92.59                                                                            | 5.03                                       | 0.5158                                    | 5.1171                                           |
| 54.00       | 0.908868                        | 1457.01                     | -6865.47                                      | 2753.99                                          | 95.06                                                                            | 5.11                                       | 0.5183                                    | 5.1408                                           |
| 55.00       | 0.908025                        | 1454.19                     | -7036.90                                      | 2760.79                                          | 97.34                                                                            | 5.37                                       | 0.5208                                    | 5.1646                                           |
| 56.00       | 0.907177                        | 1451.34                     | -7143.10                                      | 2769.74                                          | 99.00                                                                            | 5.44                                       | 0.5233                                    | 5.1891                                           |
| 57.00       | 0.906328                        | 1448.48                     | -7368.79                                      | 2778.70                                          | 101.90                                                                           | 5.50                                       | 0.5259                                    | 5.2133                                           |
| 58.00       | 0.905476                        | 1445.62                     | -7582.08                                      | 2791.95                                          | 104.75                                                                           | 5.57                                       | 0.5285                                    | 5.2377                                           |
| 59.00       | 0.904621                        | 1442.76                     | -7822.71                                      | 2800.97                                          | 107.86                                                                           | 5.65                                       | 0.5311                                    | 5.2621                                           |
| 60.00       | 0.903761                        | 1439.90                     | -8090.83                                      | 2805.76                                          | 111.24                                                                           | 5.70                                       | 0.5337                                    | 5.2865                                           |
| 61.00       | 0.902901                        | 1437.01                     | -8346.80                                      | 2812.70                                          | 114.55                                                                           | 5.78                                       | 0.5363                                    | 5.3114                                           |
| 62.00       | 0.902035                        | 1434.13                     | -8750.41                                      | 2826.07                                          | 119.52                                                                           | 5.86                                       | 0.5390                                    | 5.3356                                           |
| 63.00       | 0.901170                        | 1431.32                     | -8914.52                                      | 2826.64                                          | 121.85                                                                           | 5.92                                       | 0.5417                                    | 5.3608                                           |
| 64.00       | 0.900298                        | 1428.62                     | -8971.46                                      | 2846.49                                          | 123.24                                                                           | 6.00                                       | 0.5442                                    | 5.3860                                           |
| 65.00       | 0.899425                        | 1426.03                     | -8920.61                                      | 2853.53                                          | 123.34                                                                           | 6.08                                       | 0.5467                                    | 5.4111                                           |



**Table S.21.**Measured values of neat solvent,  $\eta_0 \times 10^3$ , Pa s, for different ethanol contents in the 25 to 65 °C temperature range.

| <i>T</i> (°C) | $\eta_0 \times 10^3$ , Pa s |                    |                    |                    |                    |                    |                    |                    |
|---------------|-----------------------------|--------------------|--------------------|--------------------|--------------------|--------------------|--------------------|--------------------|
|               | 0 % (v/v)<br>EtOH           | 10 % (v/v)<br>EtOH | 15 % (v/v)<br>EtOH | 20 % (v/v)<br>EtOH | 25 % (v/v)<br>EtOH | 30 % (v/v)<br>EtOH | 40 % (v/v)<br>EtOH | 50 % (v/v)<br>EtOH |
| 25.00         | 0.91820                     | 1.28927            | 1.35180            | 1.56531            | 1.69055            | 1.88905            | 2.15276            | 2.25556            |
| 30.00         | 0.82321                     | 1.11963            | 1.17312            | 1.33915            | 1.43864            | 1.66652            | 1.80698            | 1.89636            |
| 35.00         | 0.73599                     | 0.99707            | 1.02817            | 1.15974            | 1.23392            | 1.36282            | 1.53414            | 1.62131            |
| 40.00         | 0.66273                     | 0.86925            | 0.90894            | 1.01542            | 1.07078            | 1.17362            | 1.31876            | 1.39078            |
| 45.00         | 0.61105                     | 0.78073            | 0.81451            | 0.90098            | 0.94404            | 1.03330            | 1.15754            | 1.22160            |
| 50.00         | 0.55997                     | 0.70336            | 0.73362            | 0.80138            | 0.83885            | 0.90650            | 1.01258            | 1.06976            |
| 55.00         | 0.51717                     | 0.63804            | 0.66221            | 0.72355            | 0.74846            | 0.80861            | 0.90018            | 0.95077            |
